# Supplementary material for: High field imaging of large-scale neurotransmitter networks: Proof of concept and initial application to epilepsy
Source: PubMed Central journal article supplement — Neuroimage Clin. 2018 Apr 4;19:47–55. doi: 10.1016/j.nicl.2018.04.006 (PMC6051471; doi:10.1016/j.nicl.2018.04.006), 2018-04-04

Slice#3 Row#9 Col#9 Iothui\_141107\_c03 (14.11.07-13:14:35-STD-1.3.12.2.1107.5.2.34.18930) Series/Acq=8/1 (2014.11.07 13:48) csi\_slaser\_cFOCI TR/TE/NS=5300/38/1, 1.099E+00mL (F 048Y, 89kg) Jaap Jansen SWOL (Scannexus) \_c\_32

Data of: Section of Biomedical NMR, Eindhoven University of Technology

LCModel (Version 6.3-1H) Copyright: S. W. Provencher. Ref.: Magn. Reson. Med. 30:672-679 (1993).

16-November-2017 16:25

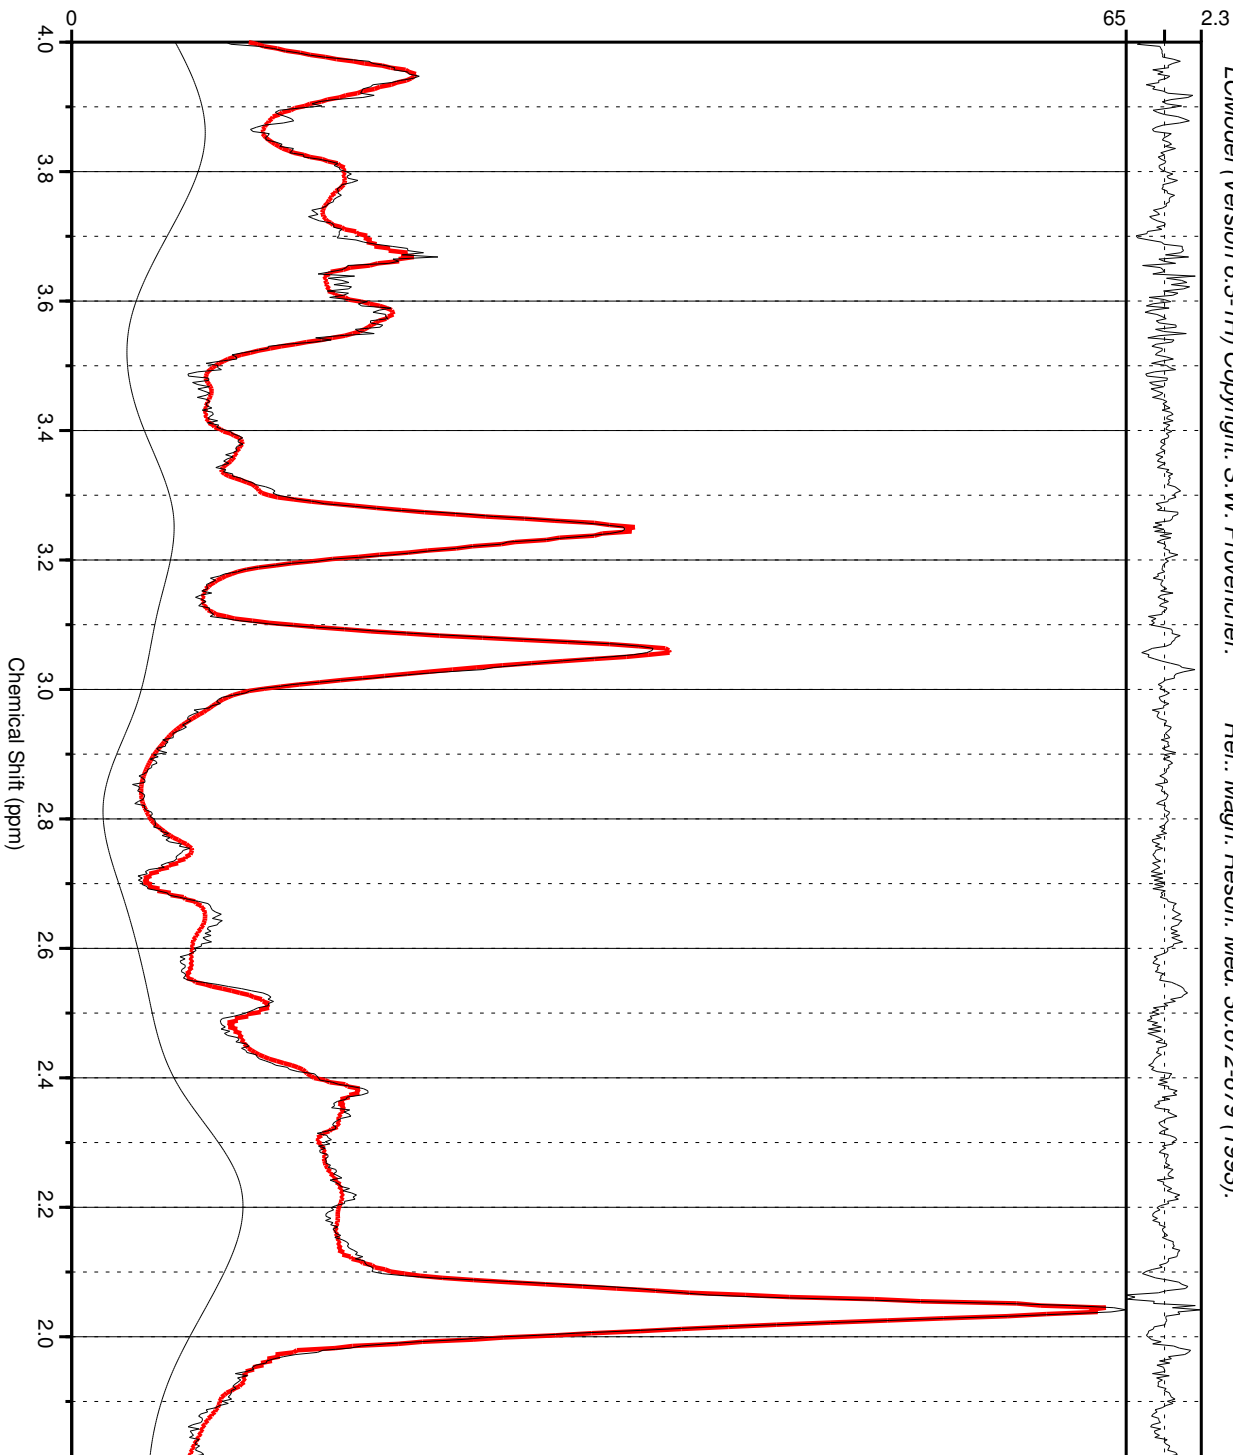

| Conc.    | %SD  | /Cr+Pcr   | Metabolite |
|----------|------|-----------|------------|
| 1.66E-03 | 105% | 1.4E-02   | Ace        |
| 2.20E-02 | 20%  | 0.179     | Asc        |
| 3.78E-03 | 24%  | 3.1E-02   | Asp        |
| 0.112    | 6%   | 0.912     | Cr         |
| 5.87E-02 | 13%  | 0.477     | GABA       |
| 0.000    | 999% | 0.000     | GLC        |
| 1.13E-02 | 22%  | 9.2E-02   | GLY        |
| 0.118    | 4%   | 0.963     | Glu        |
| 0.000    | 999% | 0.000     | Gln        |
| 1.99E-02 | 9%   | 0.162+GSH |            |
| 3.35E-02 | 3%   | 0.272     | GPC        |
| 0.121    | 4%   | 0.982     | Ins        |
| 0.201    | 2%   | 1.632     | NAA        |
| 2.36E-02 | 14%  | 0.192     | NAAg       |
| 0.000    | 999% | 0.000     | Pch        |
| 1.09E-02 | 52%  | 8.8E-02   | PCr        |
| 0.000    | 999% | 0.000     | PE         |
| 2.53E-02 | 16%  | 0.206     | Tau        |
| 5.61E-03 | 17%  | 4.6E-02   | Sc1        |
| 6.29E-02 | 6%   | 0.512     | -CrCH2     |
| 3.35E-02 | 3%   | 0.272     | GPC+PCh    |
| 0.224    | 2%   | 1.824     | NAA+NAAg   |
| 0.132    | 4%   | 1.074     | Ins+GLY    |
| 0.123    | 2%   | 1.000     | Cr+Pcr     |
| 0.118    | 4%   | 0.963     | Glu+Gln    |
| 1.01E-02 | 125% | 8.2E-02   | MM20       |

**DIAGNOSTICS**  
 1 warning MYBAS1 41  
 1 info STARTV 24  
 3 info's REFASTI 11

**MISCELLANEOUS OUTPUT**  
 FWHM = 0.046 ppm S/N = 40  
 Data shift = 0.026 ppm  
 Ph: -53 deg -17.4 deg/ppm

**INPUT CHANGES**  
 chomit(1) = 'MM'  
 chomit(2) = 'H2O'  
 deltat = 2.500e-04  
 echot = 38.00  
 filbas = '/home/tamar/.lcmode1/basi  
 s-sets/20141106\_VESPA\_7T\_nosingl  
 et\_comb.basis'

Slice#3 Row#9 Col#9 Iothui\_141107\_c03 (14.11.07-13:14:35-STD-1.3.12.2.1107.5.2.34.18930) Series/Acq=8/1 (2014.11.07 13:48) csi\_slaser\_cFOCI TR/TE/NS=5300/38/1, 1.099E+00mL (F 048Y, 89kg) Jaap Jansen SWOL (Scannexus) \_c\_32

Ace Conc. = 1.66E-03

Data of: Section of Biomedical NMR, Eindhoven University of Technology

LCModel (Version 6.3-1H) Copyright: S.W. Provencher. Ref.: Magn. Reson. Med. 30:672-679 (1993).

16-November-2017 16:25

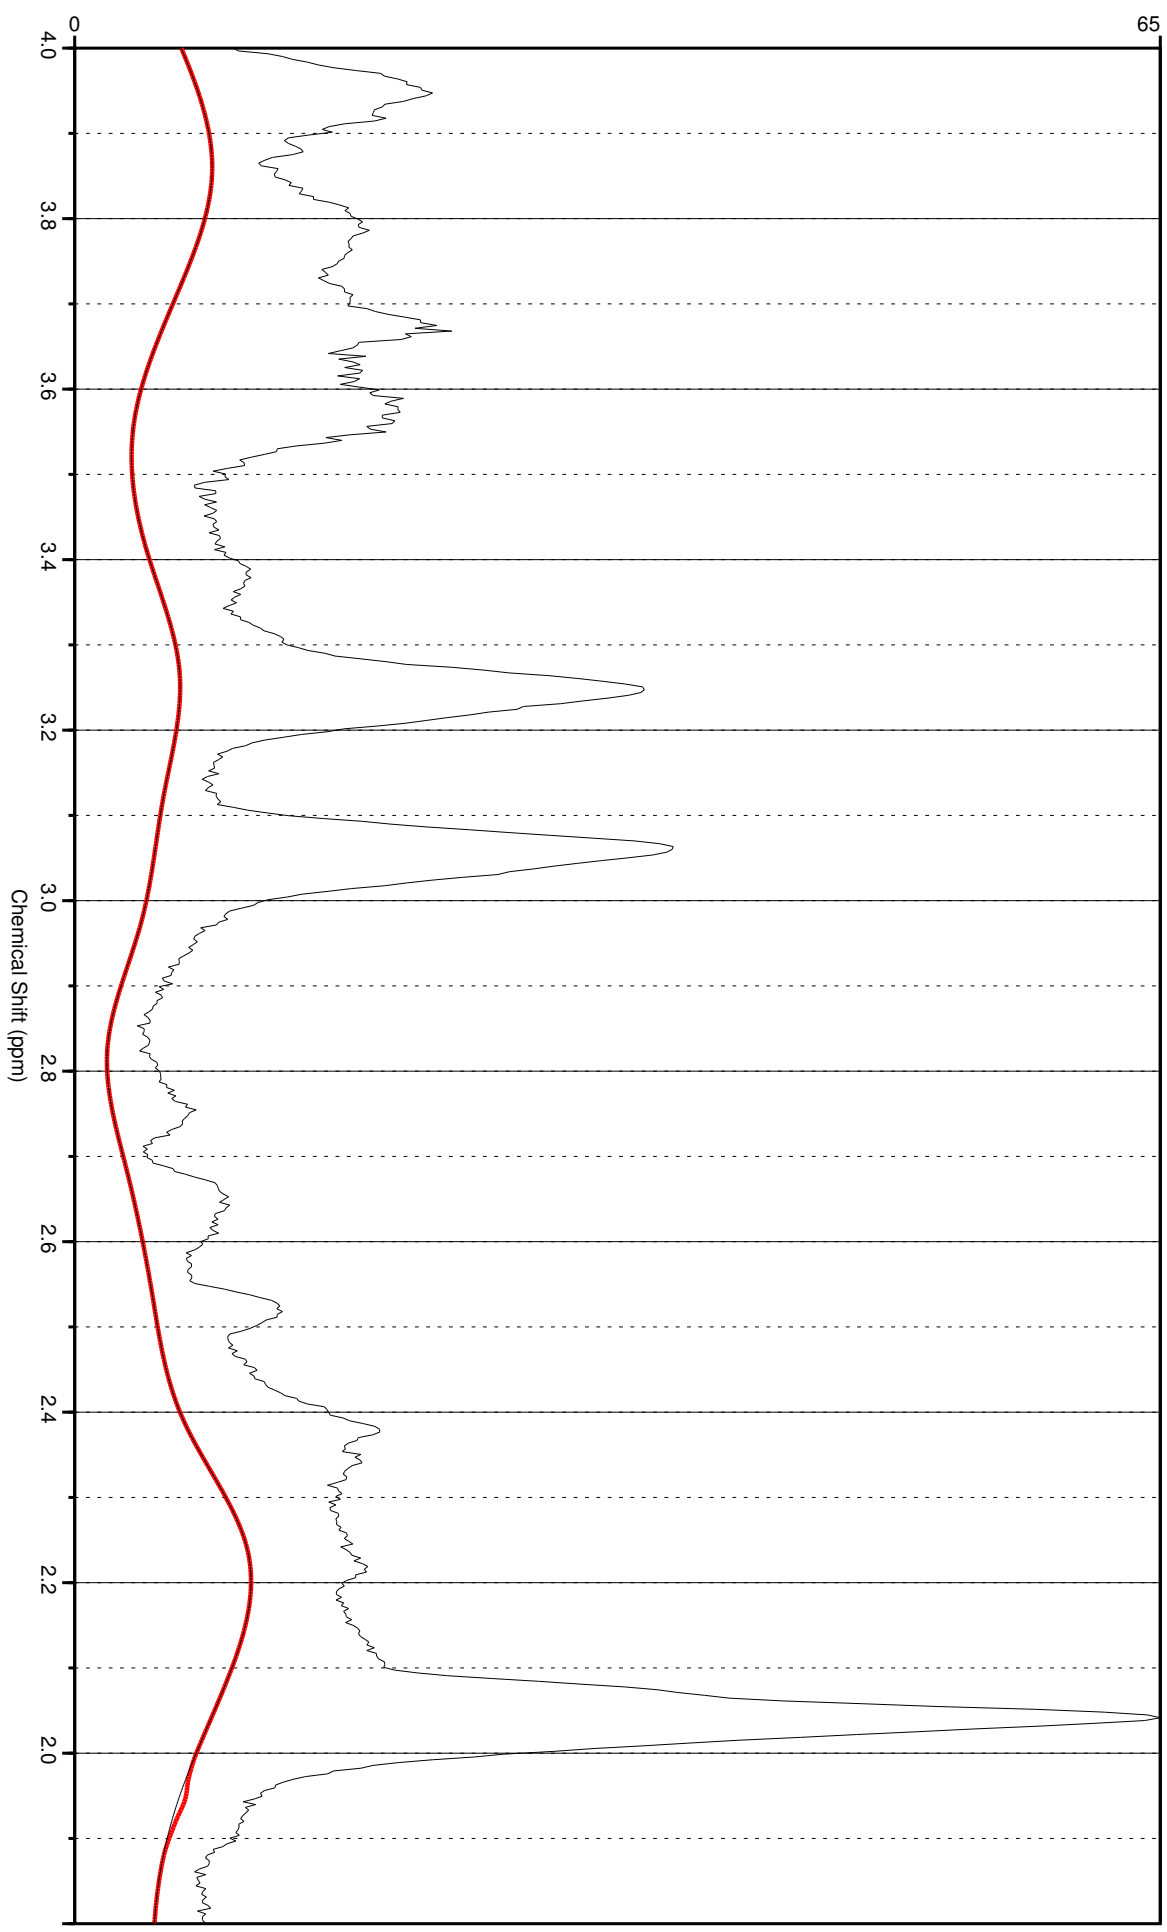

Slice#3 Row#9 Col#9 Iothui\_141107\_c03 (14.11.07-13:14:35-STD-1.3.12.2.1107.5.2.34.18930) Series/Acq=8/1 (2014.11.07 13:48) csi\_slaser\_cFOCI TR/TE/NS=5300/38/1, 1.099E+00mL (F 048Y, 89kg) Jaap Jansen SWOL (Scannexus) \_c\_32

ASC Conc. = 2.20E-02

Data of: Section of Biomedical NMR, Eindhoven University of Technology

LCModel (Version 6.3-1H) Copyright: S.W. Provencher. Ref.: Magn. Reson. Med. 30:672-679 (1993).

16-November-2017 16:25

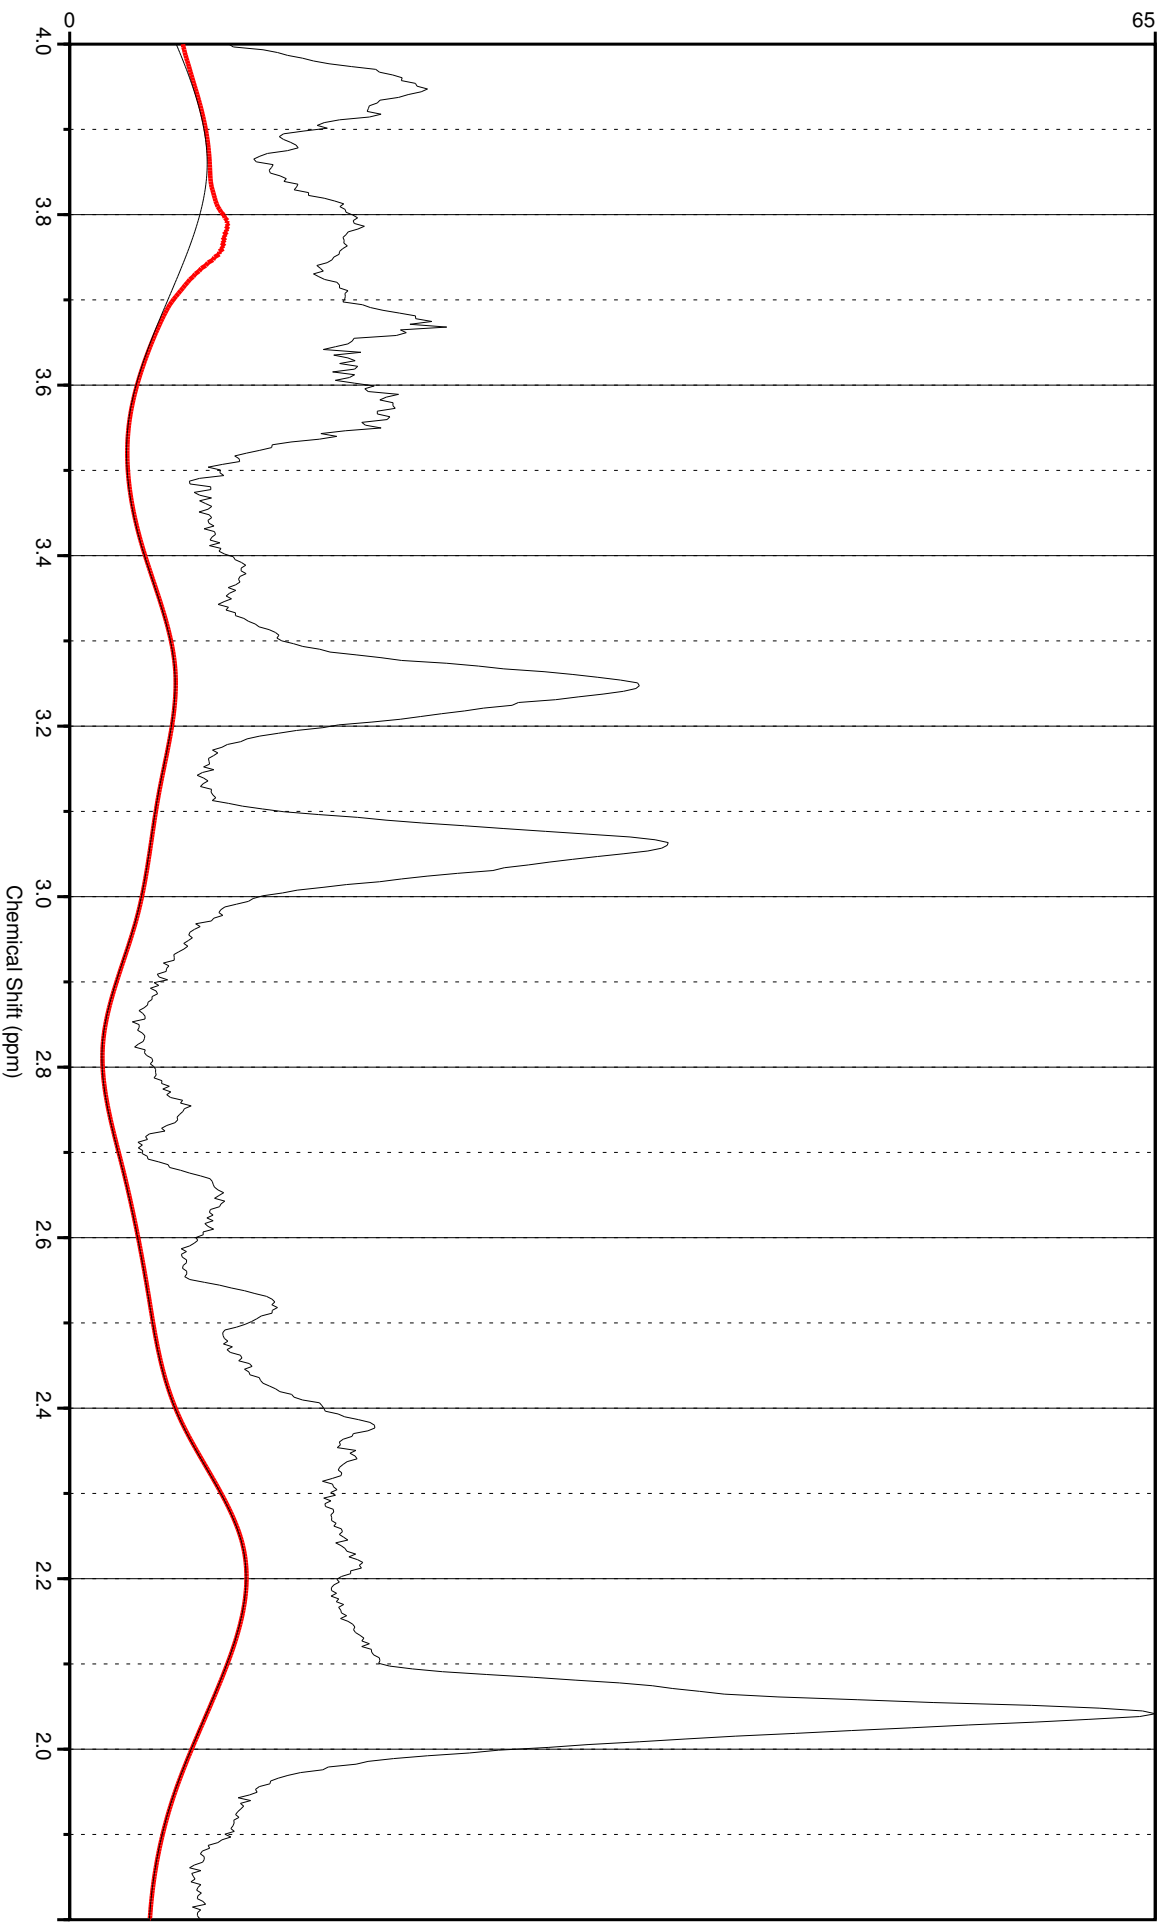

Slice#3 Row#9 Col#9 Iothui\_141107\_c03 (14.11.07-13:14:35-STD-1.3.12.2.1107.5.2.34.18930) Series/Acq=8/1 (2014.11.07 13:48) csi\_slaser\_cFOCI TR/TE/NS=5300/38/1, 1.099E+00mL (F 048Y, 89kg) Jaap Jansen SWOL (Scannexus) \_c\_32

Asp Conc. = 3.78E-03

Data of: Section of Biomedical NMR, Eindhoven University of Technology

LCModel (Version 6.3-1H) Copyright: S.W. Provencher. Ref.: Magn. Reson. Med. 30:672-679 (1993).

16-November-2017 16:25

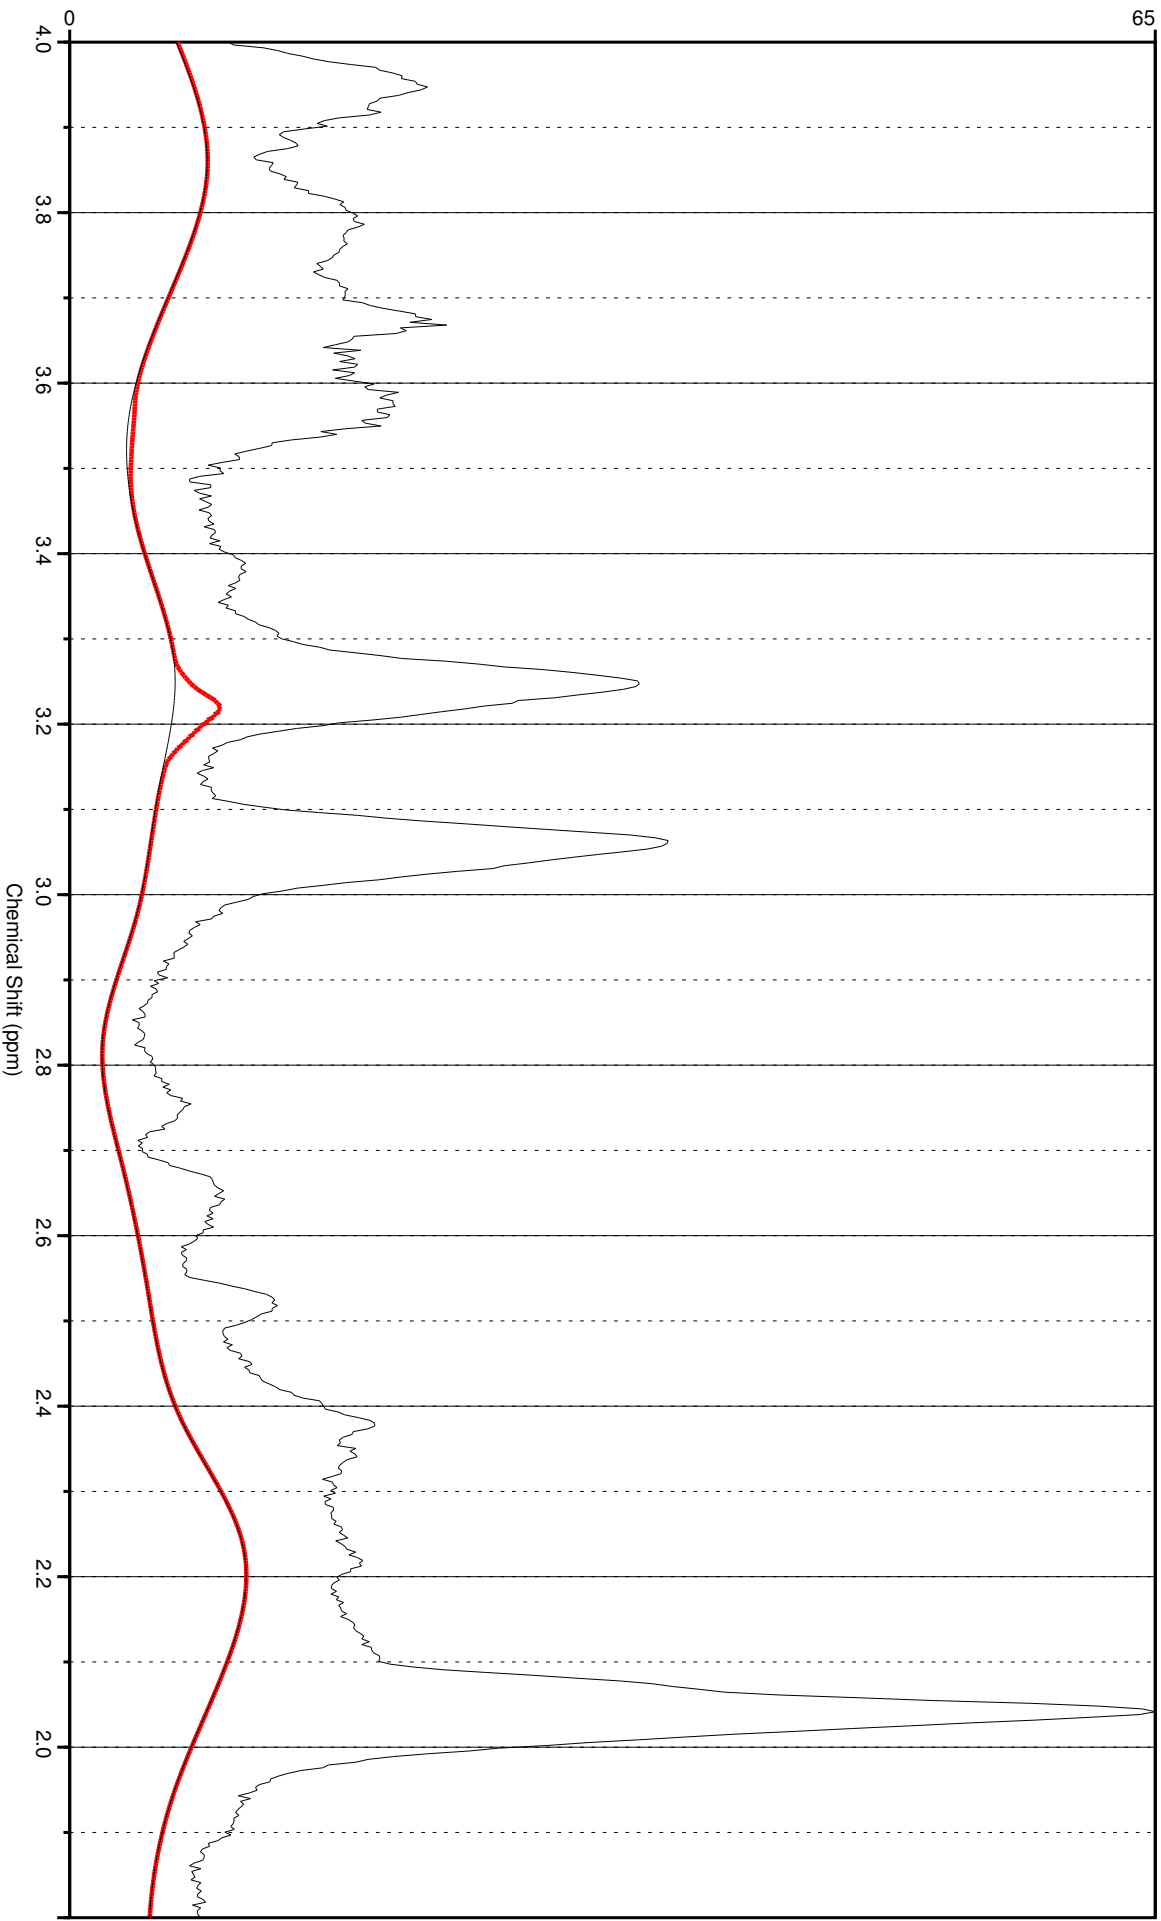

Slice#3 Row#9 Col#9 Iothui\_141107\_c03 (14.11.07-13:14:35-STD-1.3.12.2.1107.5.2.34.18930) Series/Acq=8/1 (2014.11.07 13:48) csi\_slaser\_cFOCI TR/TE/NS=5300/38/1, 1.099E+00mL (F 048Y, 89kg) Jaap Jansen SWOL (Scannexus) \_c\_32

Cr Conc. = 1.12E-01

Data of: Section of Biomedical NMR, Eindhoven University of Technology

LCModel (Version 6.3-1H) Copyright: S.W. Provencher. Ref.: Magn. Reson. Med. 30:672-679 (1993).

16-November-2017 16:25

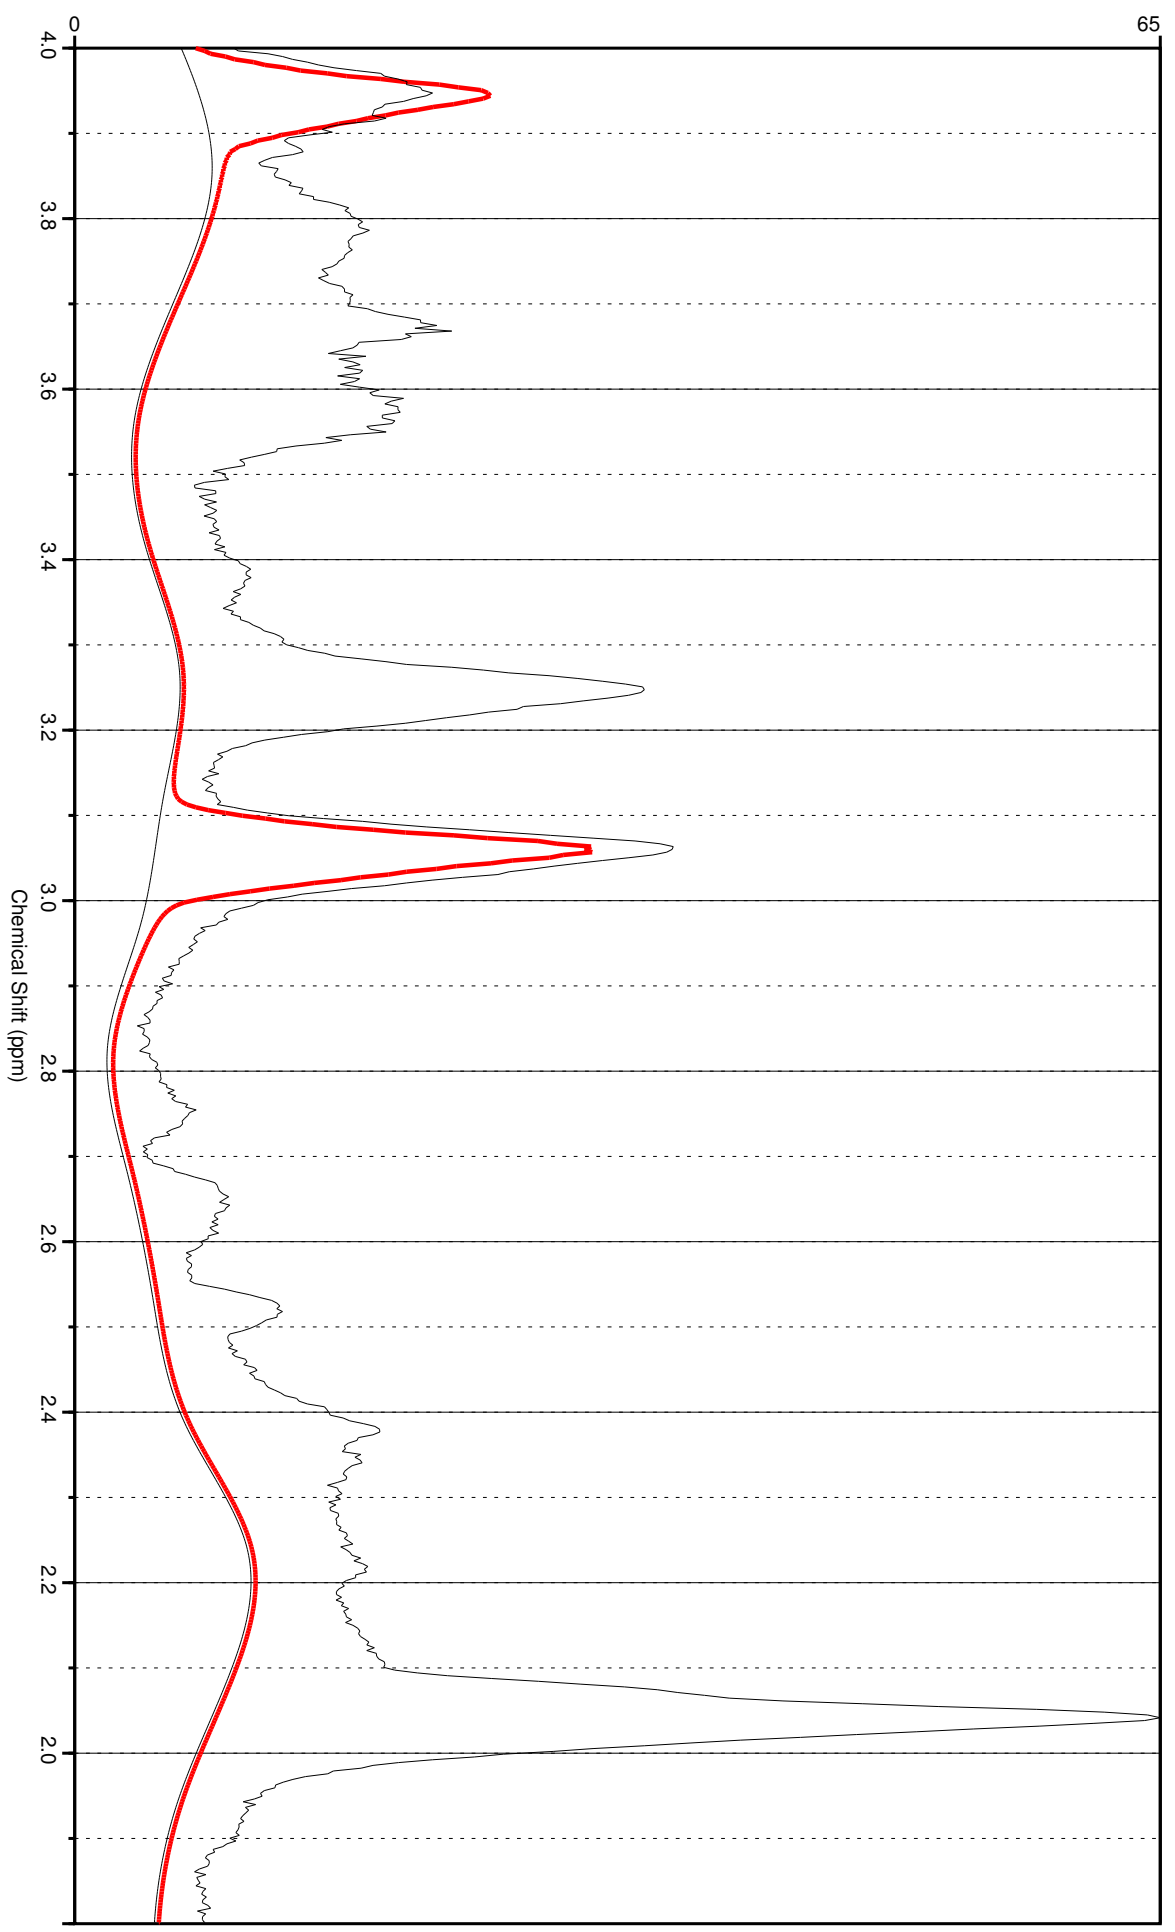

Slice#3 Row#9 Col#9 Iothui\_141107\_c03 (14.11.07-13:14:35-STD-1.3.12.2.1107.5.2.34.18930) Series/Acq=8/1 (2014.11.07 13:48) csi\_slaser\_cFOCI TR/TE/NS=5300/38/1, 1.099E+00mL (F 048Y, 89kg) Jaap Jansen SWOL (Scannexus) \_c\_32

GABA Conc. = 5.87E-02

Data of: Section of Biomedical NMR, Eindhoven University of Technology

LCModel (Version 6.3-1H) Copyright: S.W. Provencher. Ref.: Magn. Reson. Med. 30:672-679 (1993).

16-November-2017 16:25

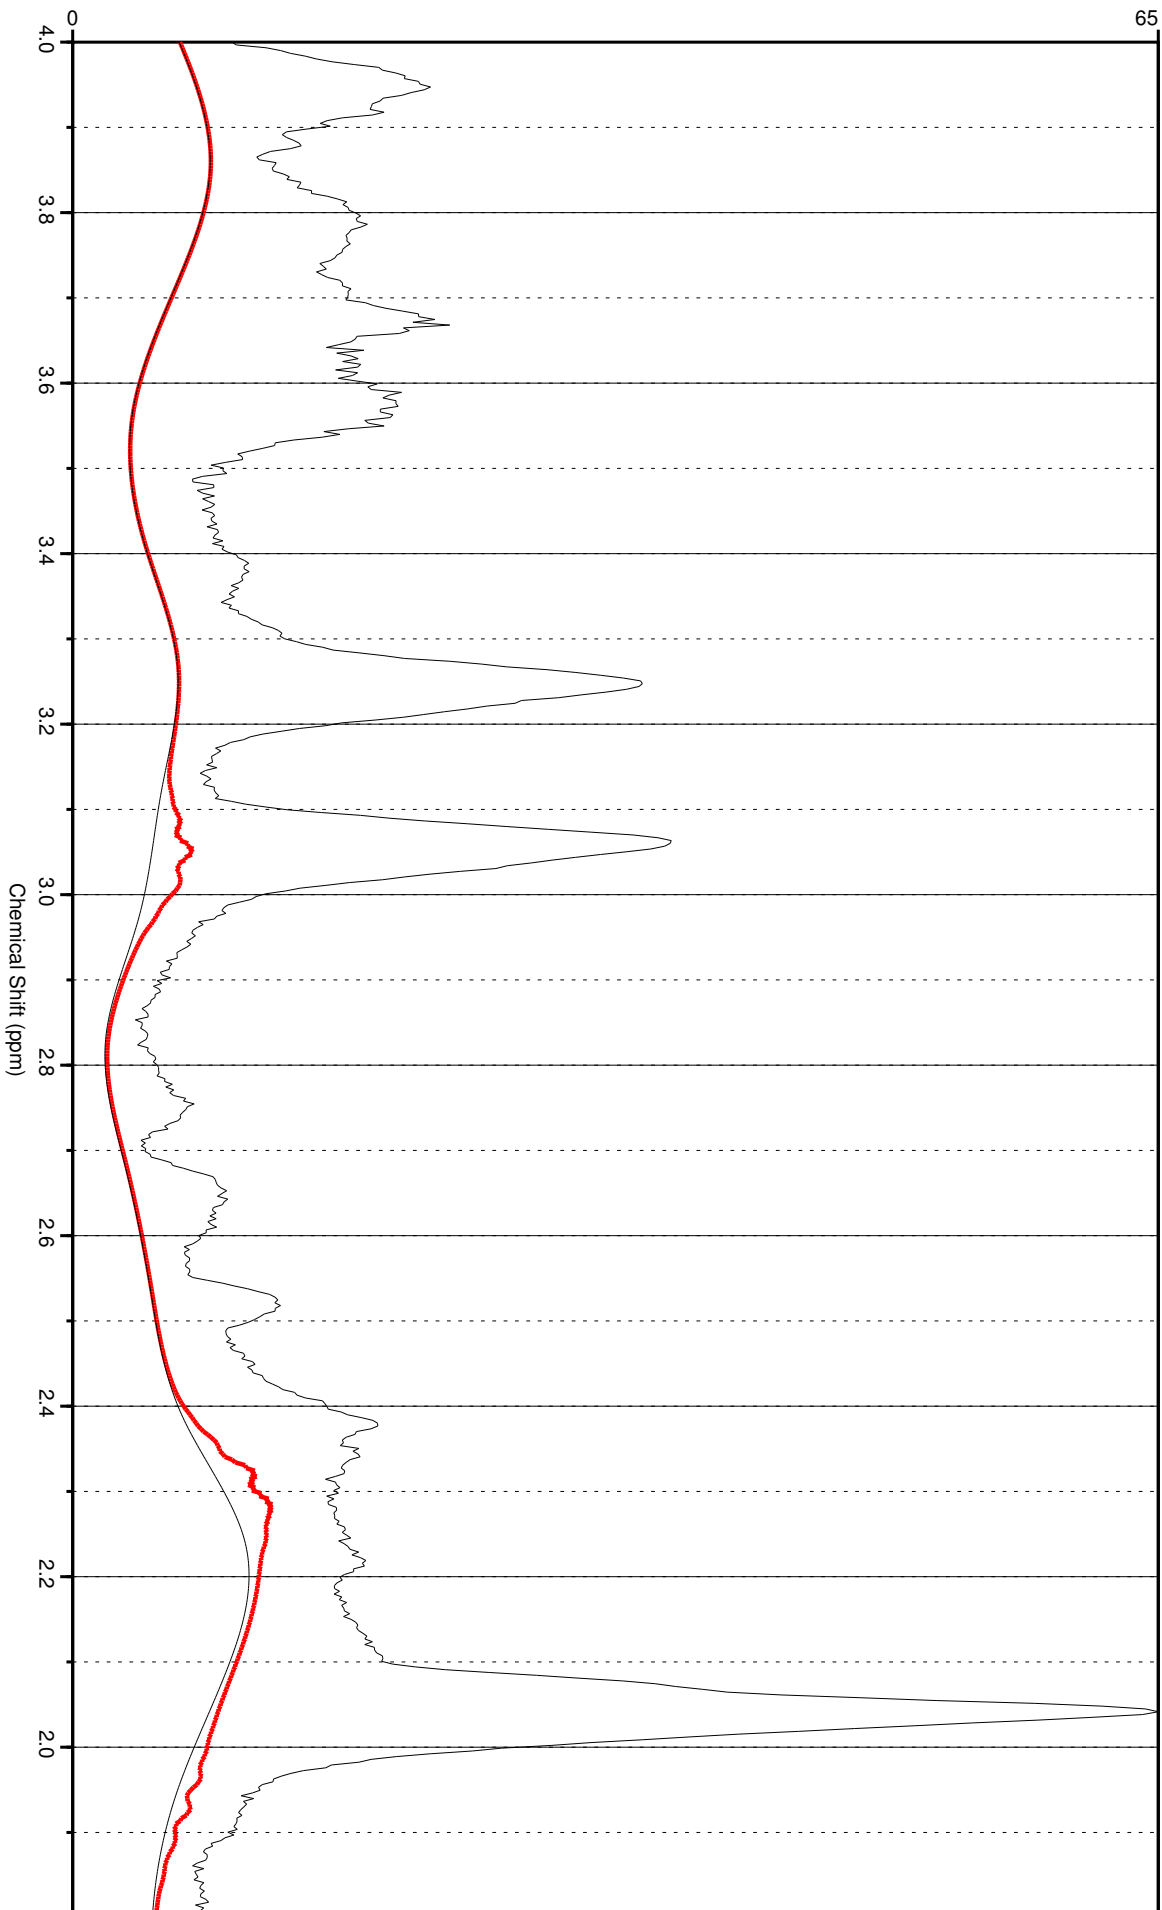

Slice#3 Row#9 Col#9 Iothui\_141107\_c03 (14.11.07-13:14:35-STD-1.3.12.2.1107.5.2.34.18930) Series/Acq=8/1 (2014.11.07 13:48) csi\_slaser\_cFOCI TR/TE/NS=5300/38/1, 1.099E+00mL (F 048Y, 89kg) Jaap Jansen SWOL (Scannexus) \_c\_32

Gly Conc. = 1.13E-02

Data of: Section of Biomedical NMR, Eindhoven University of Technology

LCModel (Version 6.3-1H) Copyright: S.W. Provencher. Ref.: Magn. Reson. Med. 30:672-679 (1993).

16-November-2017 16:25

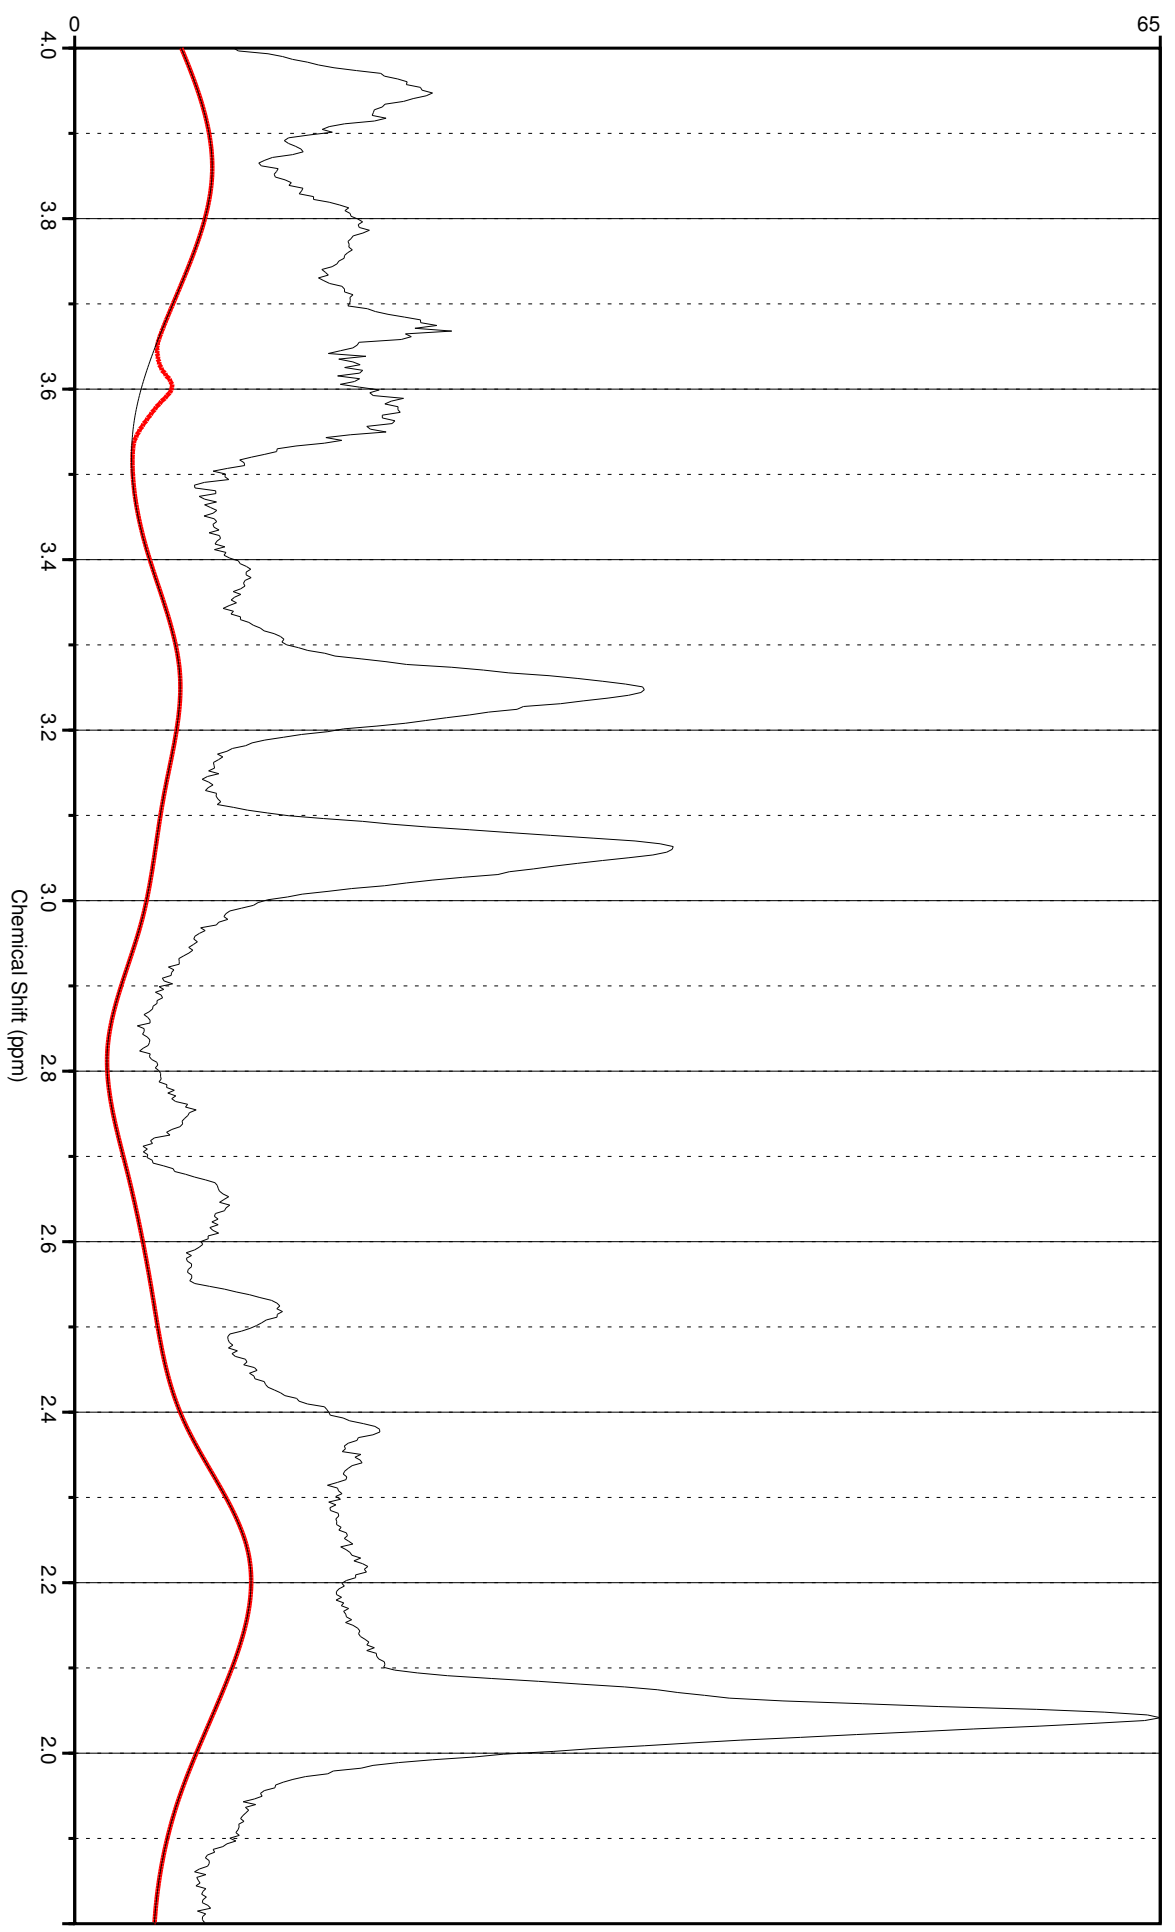

Slice#3 Row#9 Col#9 Iothui\_141107\_c03 (14.11.07-13:14:35-STD-1.3.12.2.1107.5.2.34.18930) Series/Acq=8/1 (2014.11.07 13:48) csi\_slaser\_cFOCI TR/TE/NS=5300/38/1, 1.099E+00mL (F 048Y, 89kg) Jaap Jansen SWOL (Scannexus) \_c\_32

GIU Conc. = 1.18E-01

Data of: Section of Biomedical NMR, Eindhoven University of Technology

LCModel (Version 6.3-1H) Copyright: S.W. Provencher. Ref.: Magn. Reson. Med. 30:672-679 (1993).

16-November-2017 16:25

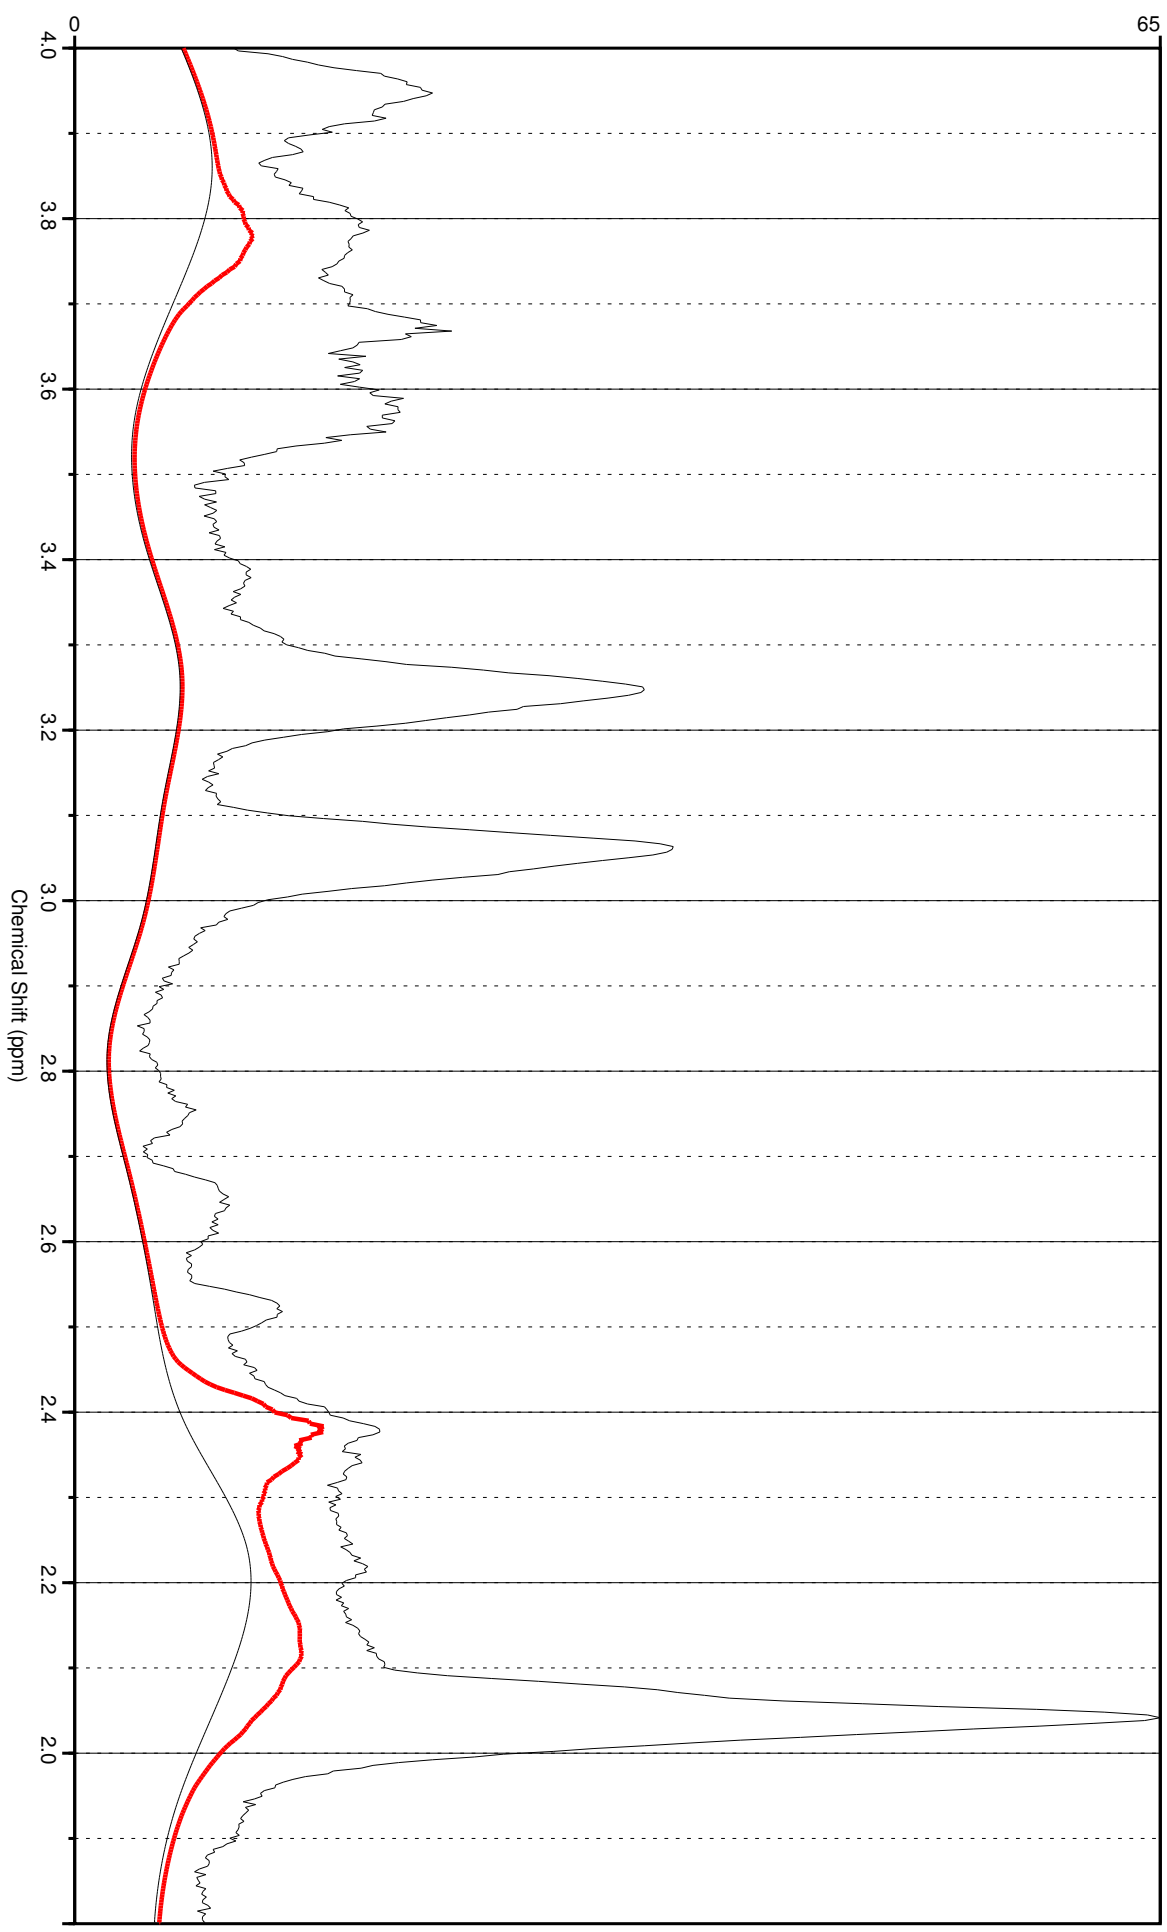



Slice#3 Row#9 Col#9 Iothui\_141107\_c03 (14.11.07-13:14:35-STD-1.3.12.2.1107.5.2.34.18930) Series/Acq=8/1 (2014.11.07 13:48) csi\_slaser\_cFOCI TR/TE/NS=5300/38/1, 1.099E+00mL (F 048Y, 89kg) Jaap Jansen SWOL (Scannexus) \_c\_32

GSH Conc. = 1.99E-02

Data of: Section of Biomedical NMR, Eindhoven University of Technology

LCModel (Version 6.3-1H) Copyright: S.W. Provencher. Ref.: Magn. Reson. Med. 30:672-679 (1993).

16-November-2017 16:25

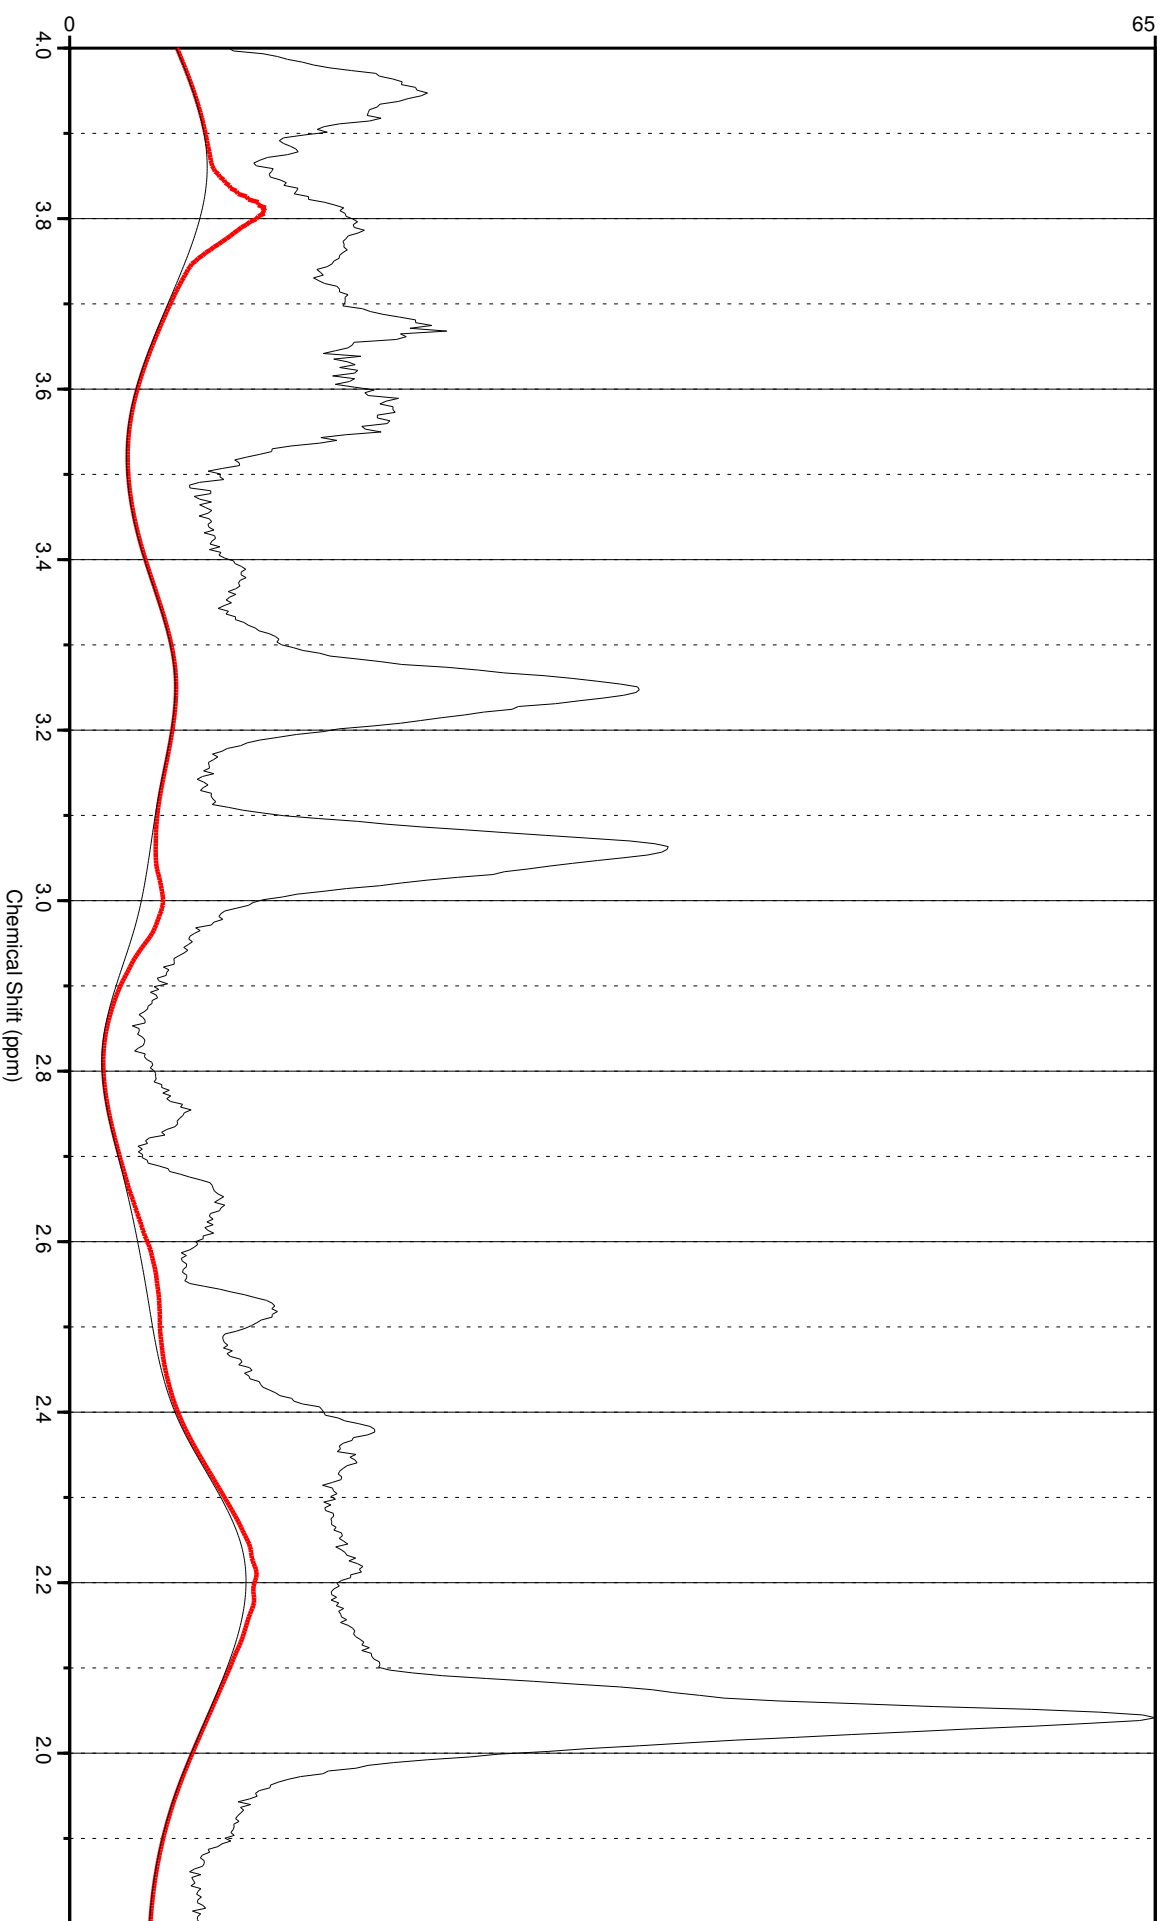

Slice#3 Row#9 Col#9 Iothui\_141107\_c03 (14.11.07-13:14:35-STD-1.3.12.2.1107.5.2.34.18930) Series/Acq=8/1 (2014.11.07 13:48) csi\_slaser\_cFOCI TR/TE/NS=5300/38/1, 1.099E+00mL (F 048Y, 89kg) Jaap Jansen SWOL (Scannexus) \_c\_32

GPC Conc. = 3.35E-02

Data of: Section of Biomedical NMR, Eindhoven University of Technology

LCModel (Version 6.3-1H) Copyright: S.W. Provencher. Ref.: Magn. Reson. Med. 30:672-679 (1993).

16-November-2017 16:25

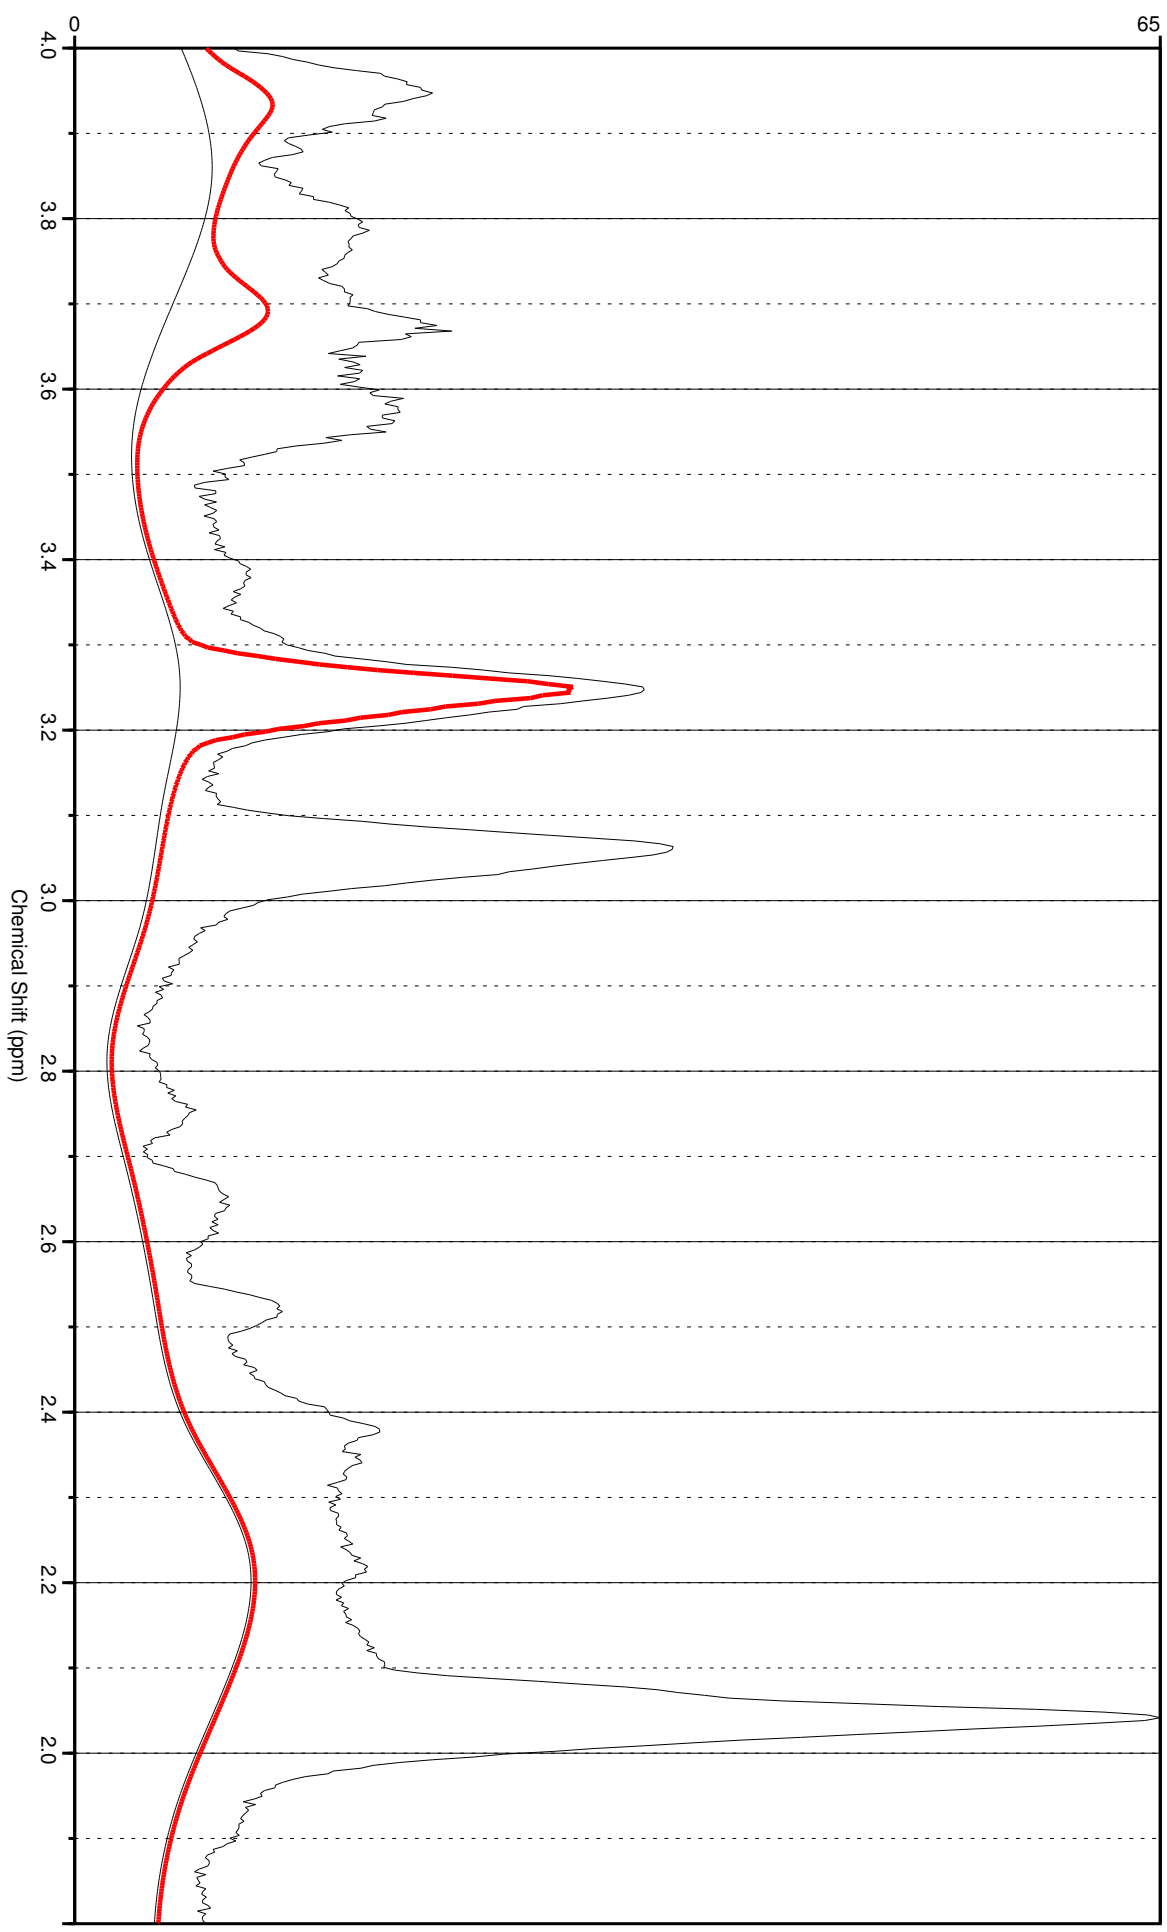

Slice#3 Row#9 Col#9 lothui\_141107\_c03 (14.11.07-13:14:35-STD-1.3.12.2.1107.5.2.34.18930) Series/Acq=8/1 (2014.11.07 13:48) csi\_slaser\_cFOCI TR/TE/NS=5300/38/1, 1.099E+00mL (F 048Y, 89kg) Jaap Jansen SWOL (Scannexus) \_c\_32

Ins Conc. = 1.21E-01

Data of: Section of Biomedical NMR, Eindhoven University of Technology

LCModel (Version 6.3-1H) Copyright: S.W. Provencher. Ref.: Magn. Reson. Med. 30:672-679 (1993).

16-November-2017 16:25

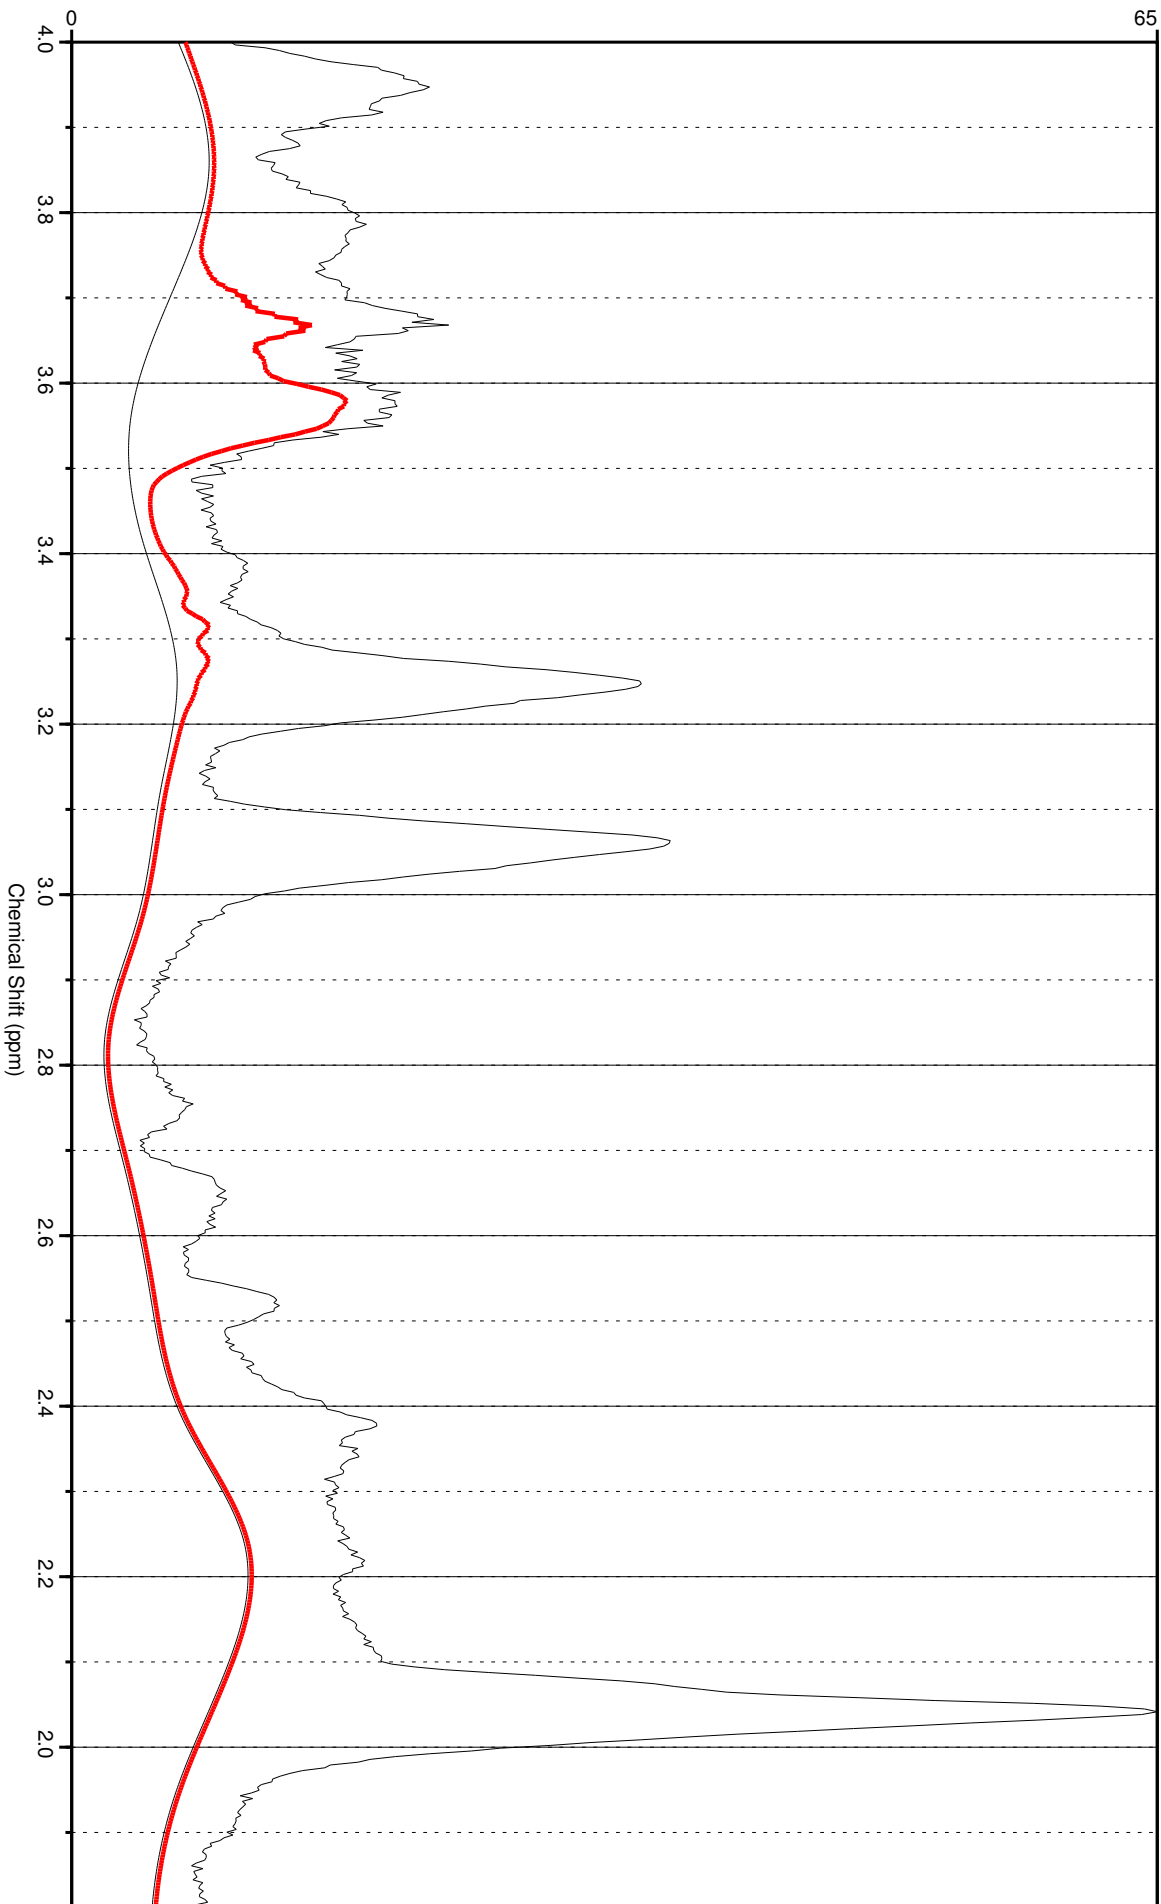

Slice#3 Row#9 Col#9 Iothui\_141107\_c03 (14.11.07-13:14:35-STD-1.3.12.2.1107.5.2.34.18930) Series/Acq=8/1 (2014.11.07 13:48) csi\_slaser\_cFOCI TR/TE/NS=5300/38/1, 1.099E+00mL (F 048Y, 89kg) Jaap Jansen SWOL (Scannexus) \_c\_32

NAA Conc. = 2.01E-01

Data of: Section of Biomedical NMR, Eindhoven University of Technology

LCModel (Version 6.3-1H) Copyright: S.W. Provencher. Ref.: Magn. Reson. Med. 30:672-679 (1993).

16-November-2017 16:25

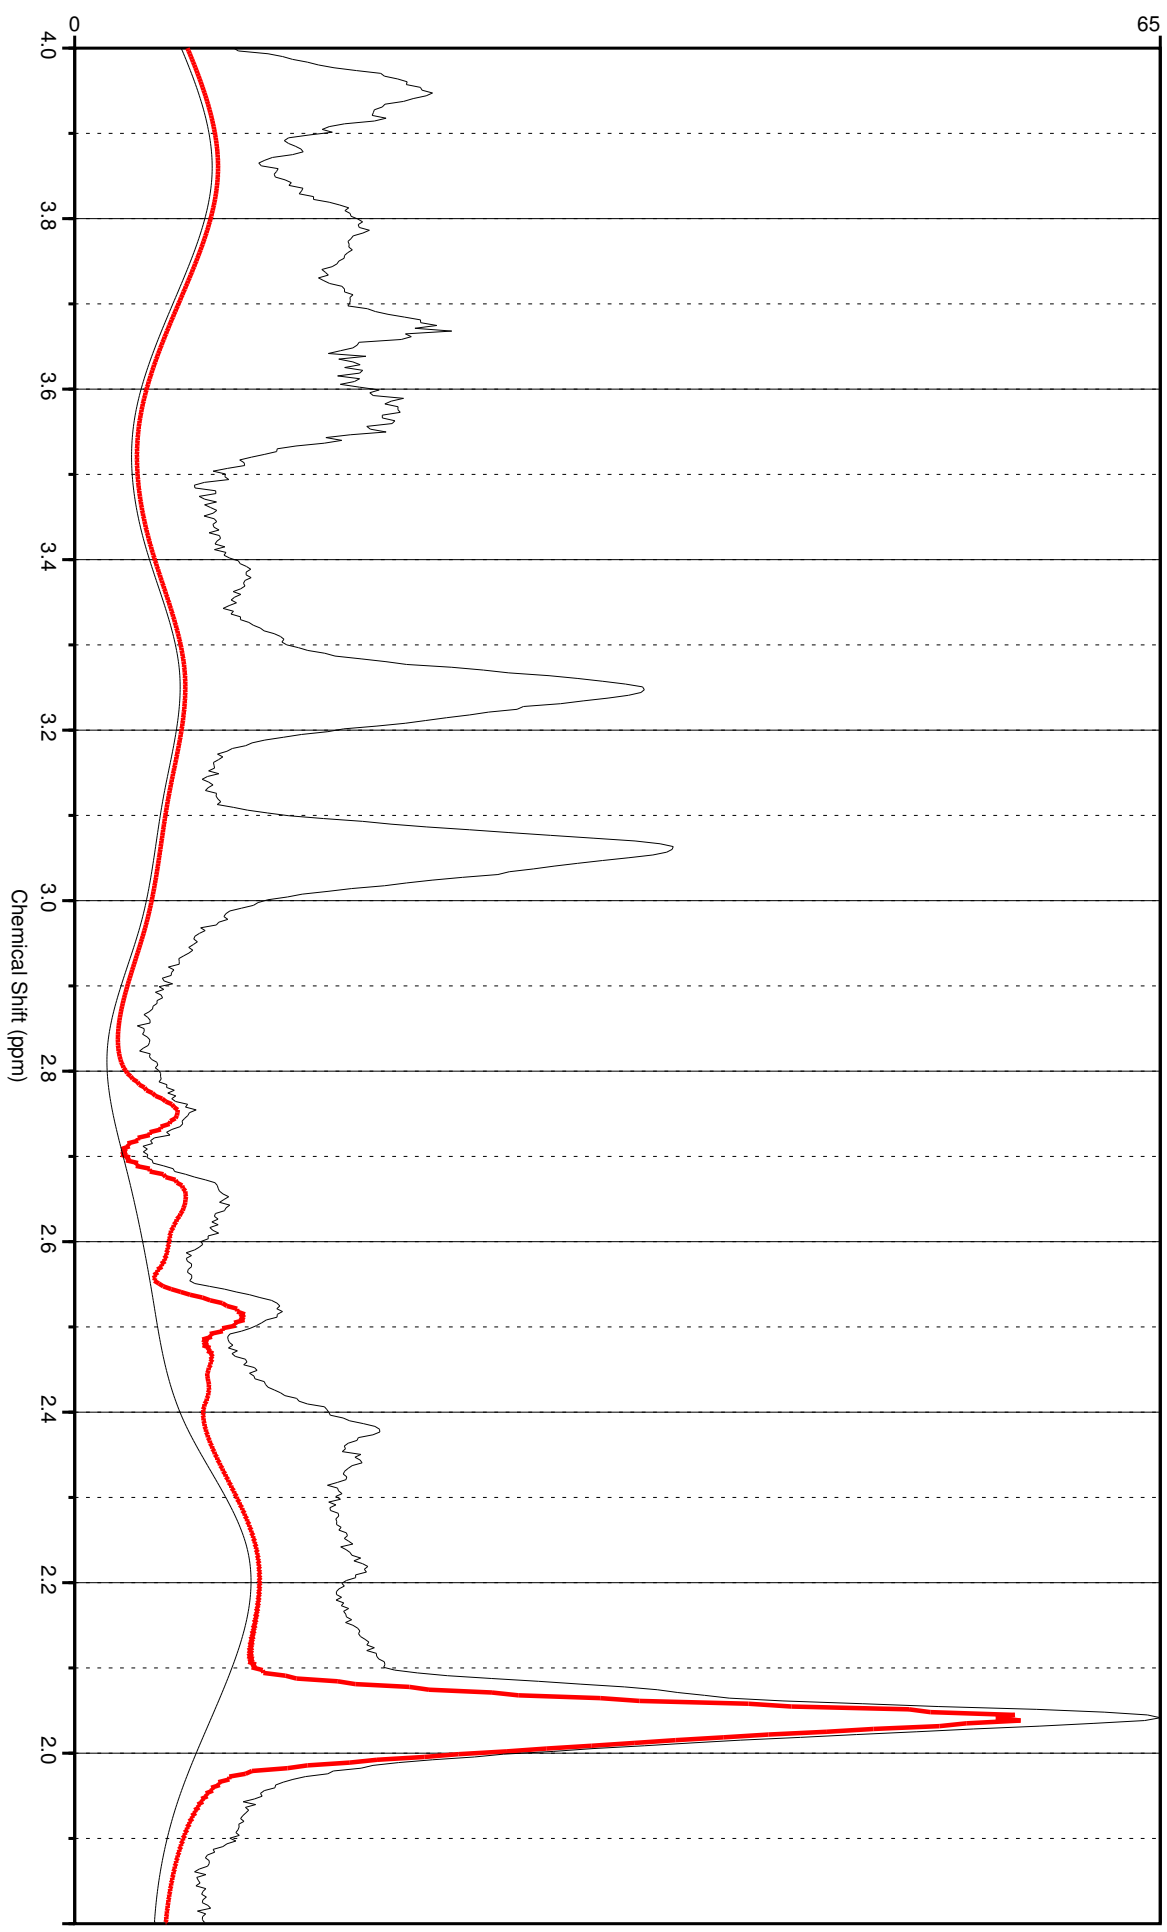

Slice#3 Row#9 Col#9 Iothui\_141107\_c03 (14.11.07-13:14:35-STD-1.3.12.2.1107.5.2.34.18930) Series/Acq=8/1 (2014.11.07 13:48) csi\_slaser\_cFOCI TR/TE/NS=5300/38/1, 1.099E+00mL (F 048Y, 89kg) Jaap Jansen SWOL (Scannexus) \_c\_32

NAAG Conc. = 2.36E-02

Data of: Section of Biomedical NMR, Eindhoven University of Technology

LCModel (Version 6.3-1H) Copyright: S.W. Provencher. Ref.: Magn. Reson. Med. 30:672-679 (1993).

16-November-2017 16:25

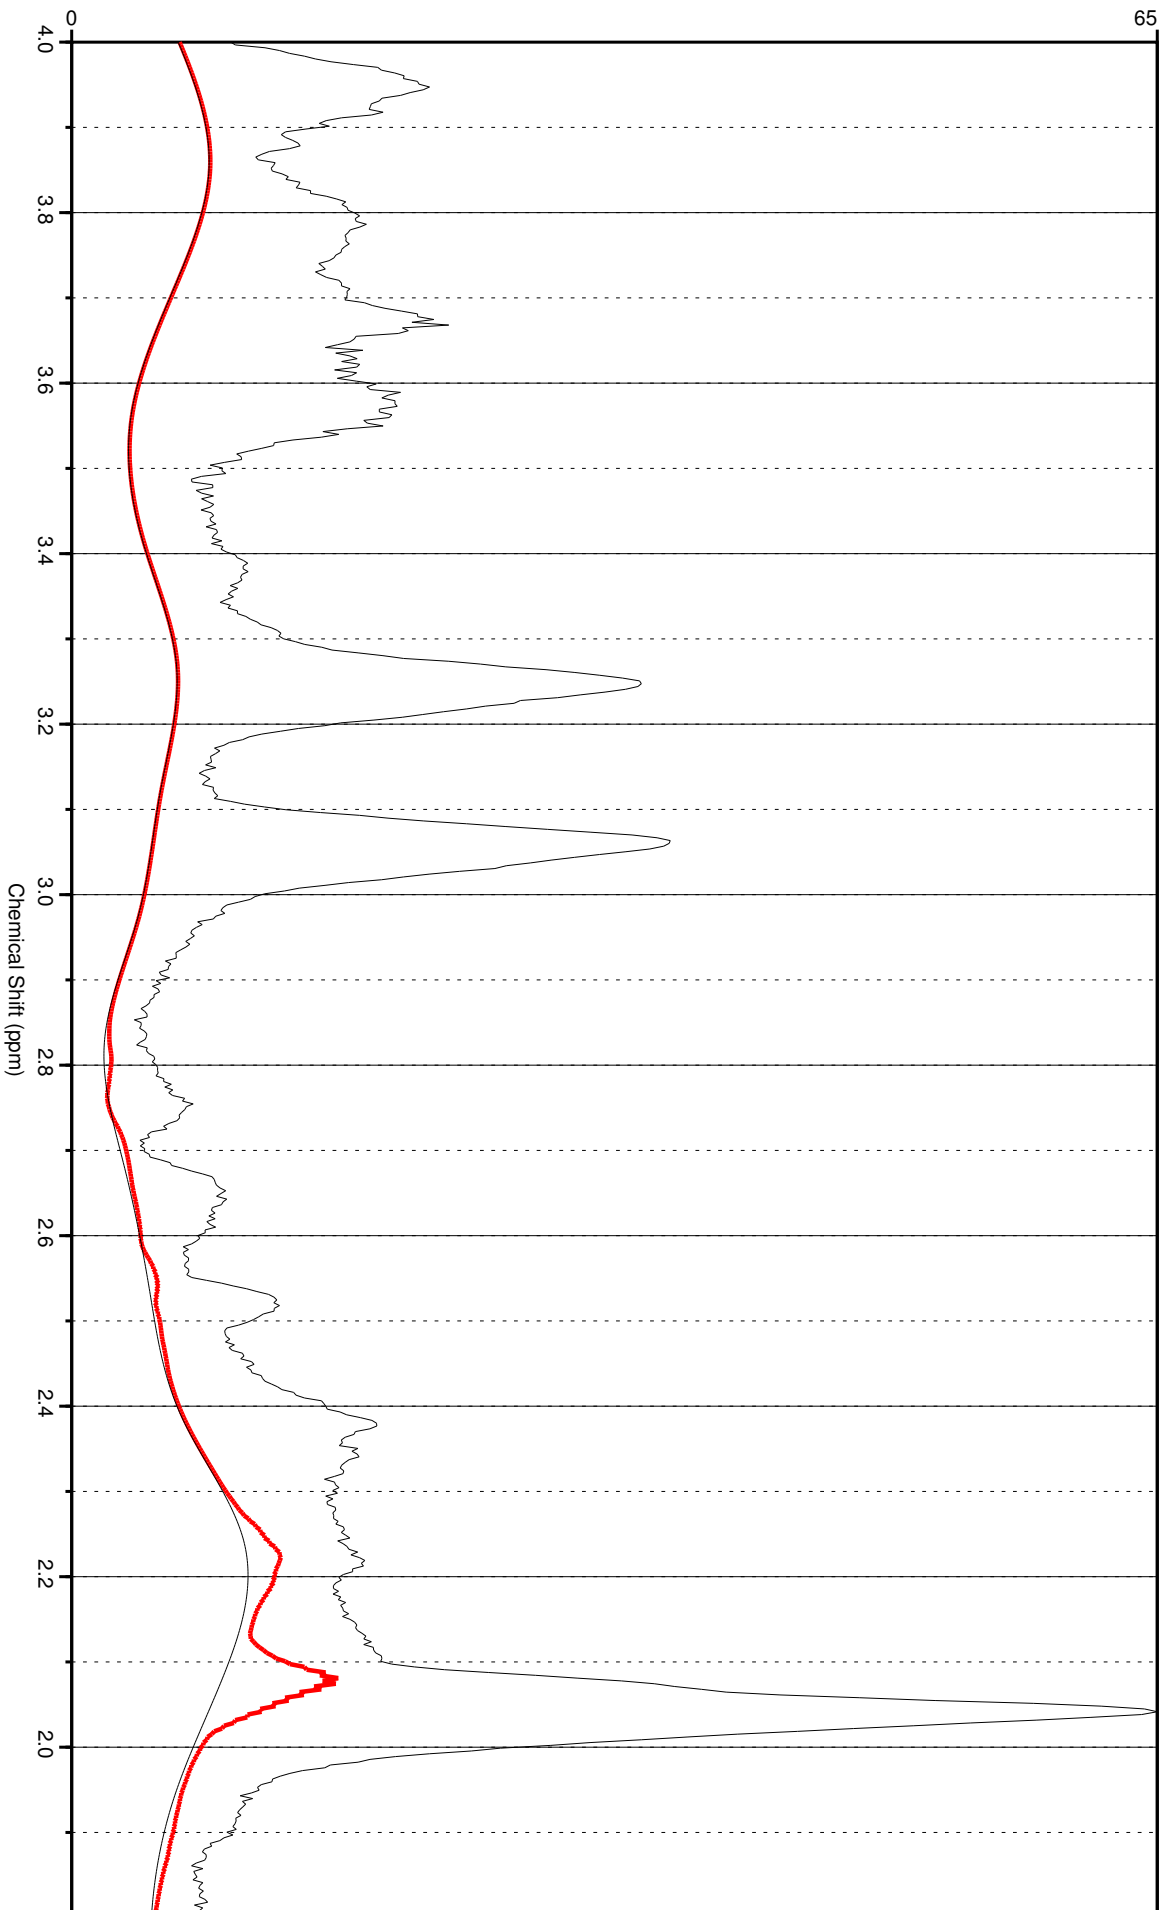

Slice#3 Row#9 Col#9 Iothui\_141107\_c03 (14.11.07-13:14:35-STD-1.3.12.2.1107.5.2.34.18930) Series/Acq=8/1 (2014.11.07 13:48) csi\_slaser\_cFOCI TR/TE/NS=5300/38/1, 1.099E+00mL (F 048Y, 89kg) Jaap Jansen SWOL (Scannexus) \_c\_32

PCr Conc. = 1.09E-02

Data of: Section of Biomedical NMR, Eindhoven University of Technology

LCModel (Version 6.3-1H) Copyright: S.W. Provencher. Ref.: Magn. Reson. Med. 30:672-679 (1993).

16-November-2017 16:25

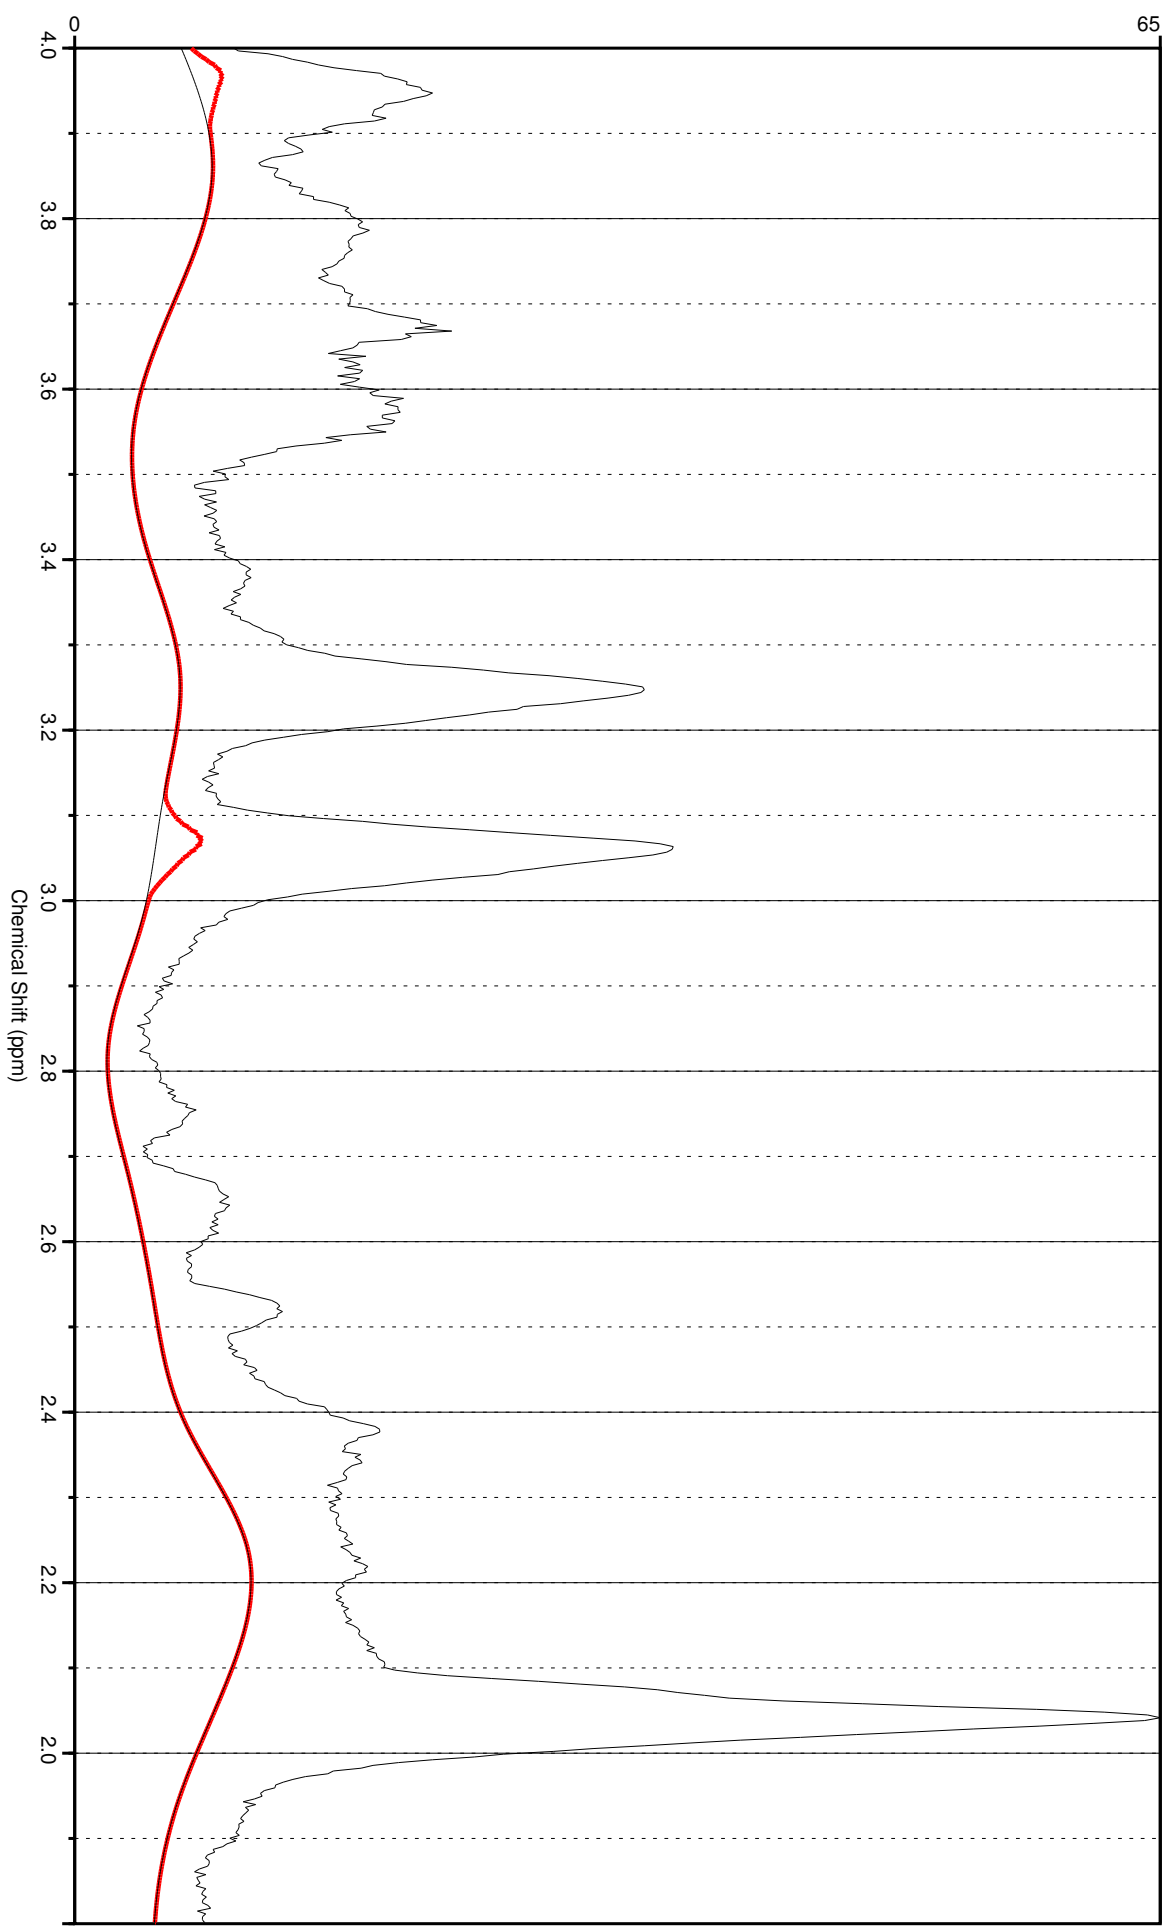

Slice#3 Row#9 Col#9 Iothui\_141107\_c03 (14.11.07-13:14:35-STD-1.3.12.2.1107.5.2.34.18930) Series/Acq=8/1 (2014.11.07 13:48) csi\_slaser\_cFOCI TR/TE/NS=5300/38/1, 1.099E+00mL (F 048Y, 89kg) Jaap Jansen SWOL (Scannexus) \_c\_32

Tau Conc. = 2.53E-02

Data of: Section of Biomedical NMR, Eindhoven University of Technology

LCModel (Version 6.3-1H) Copyright: S.W. Provencher. Ref.: Magn. Reson. Med. 30:672-679 (1993).

16-November-2017 16:25

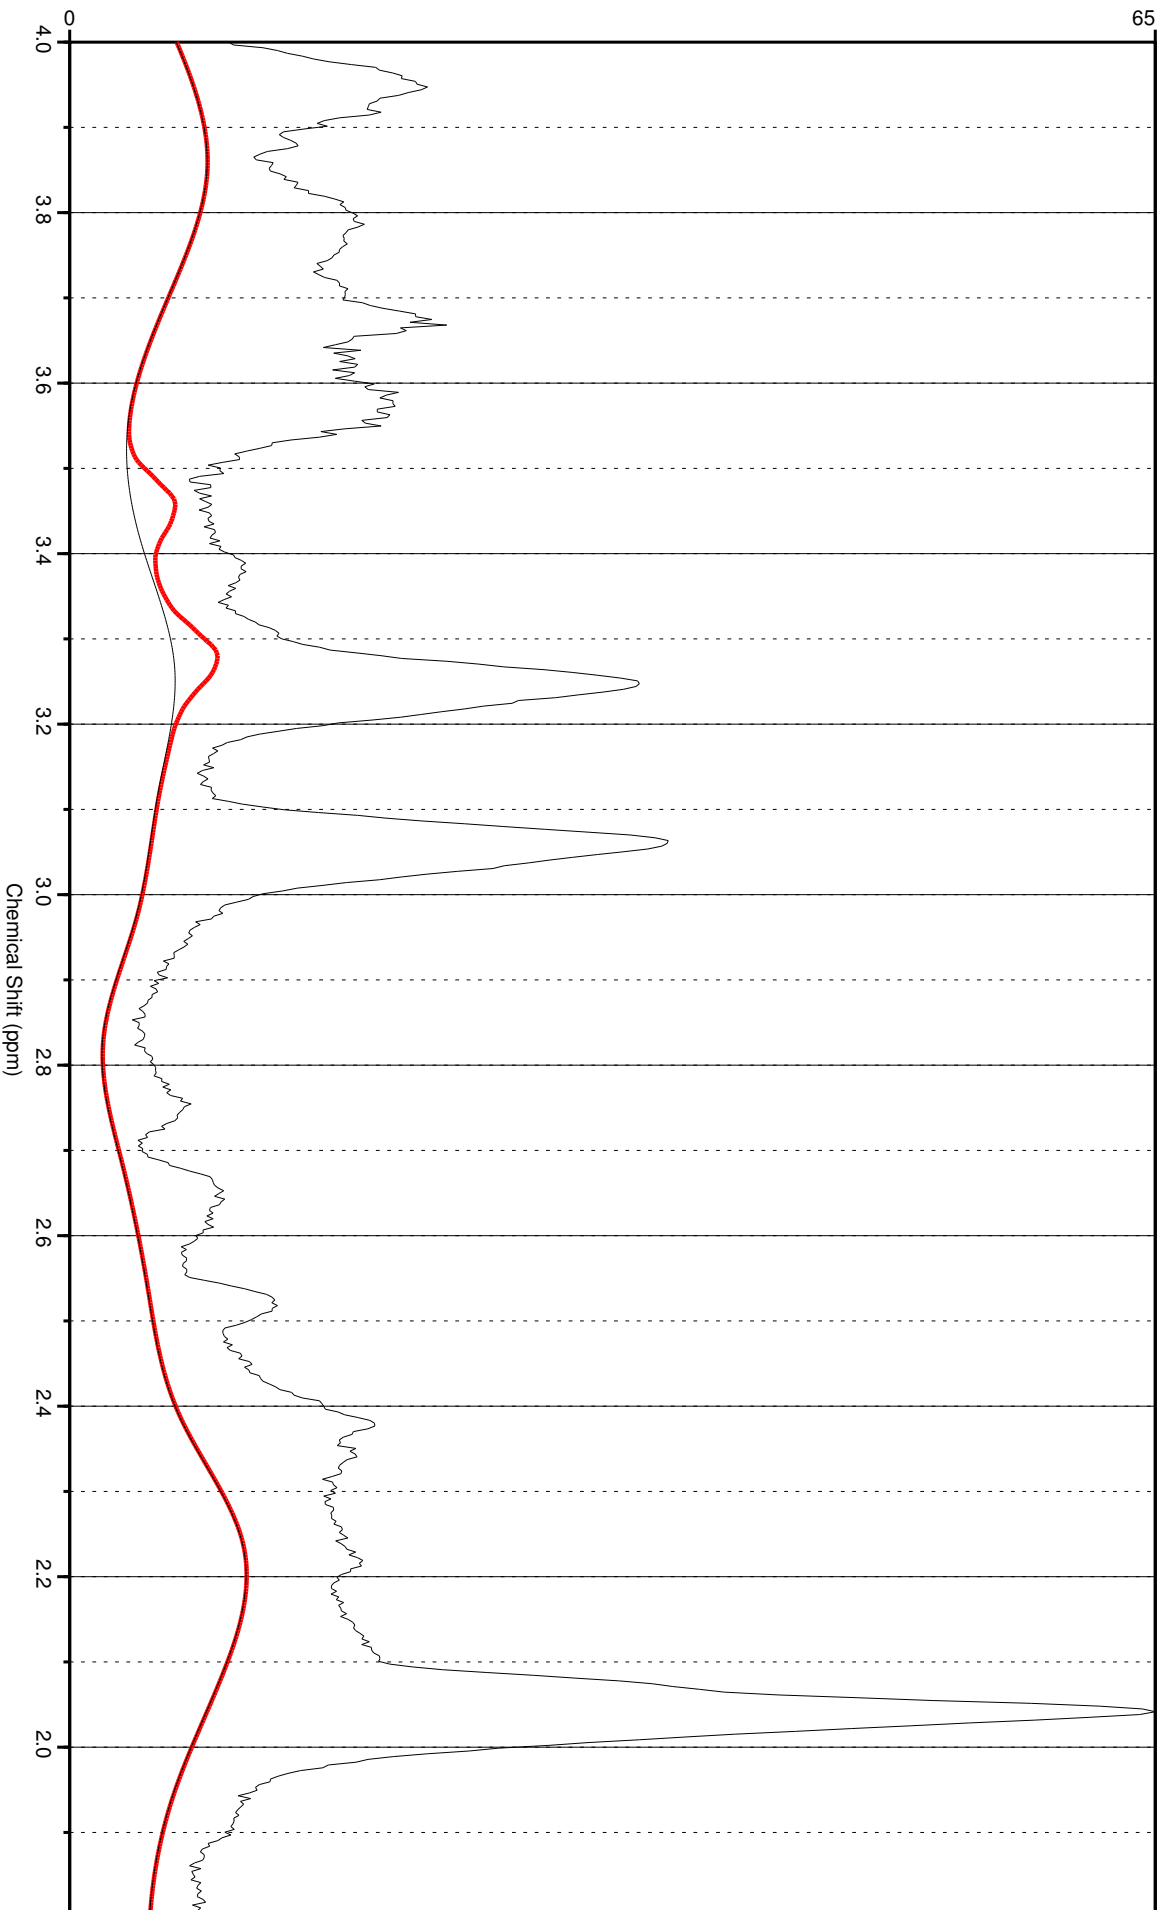

Slice#3 Row#9 Col#9 Iothui\_141107\_c03 (14.11.07-13:14:35-STD-1.3.12.2.1107.5.2.34.18930) Series/Acq=8/1 (2014.11.07 13:48) csi\_slaser\_cFOCI TR/TE/NS=5300/38/1, 1.099E+00mL (F 048Y, 89kg) Jaap Jansen SWOL (Scannexus) \_c\_32

Sci Conc. = 5.61E-03

Data of: Section of Biomedical NMR, Eindhoven University of Technology

LCModel (Version 6.3-1H) Copyright: S.W. Provencher. Ref.: Magn. Reson. Med. 30:672-679 (1993).

16-November-2017 16:25

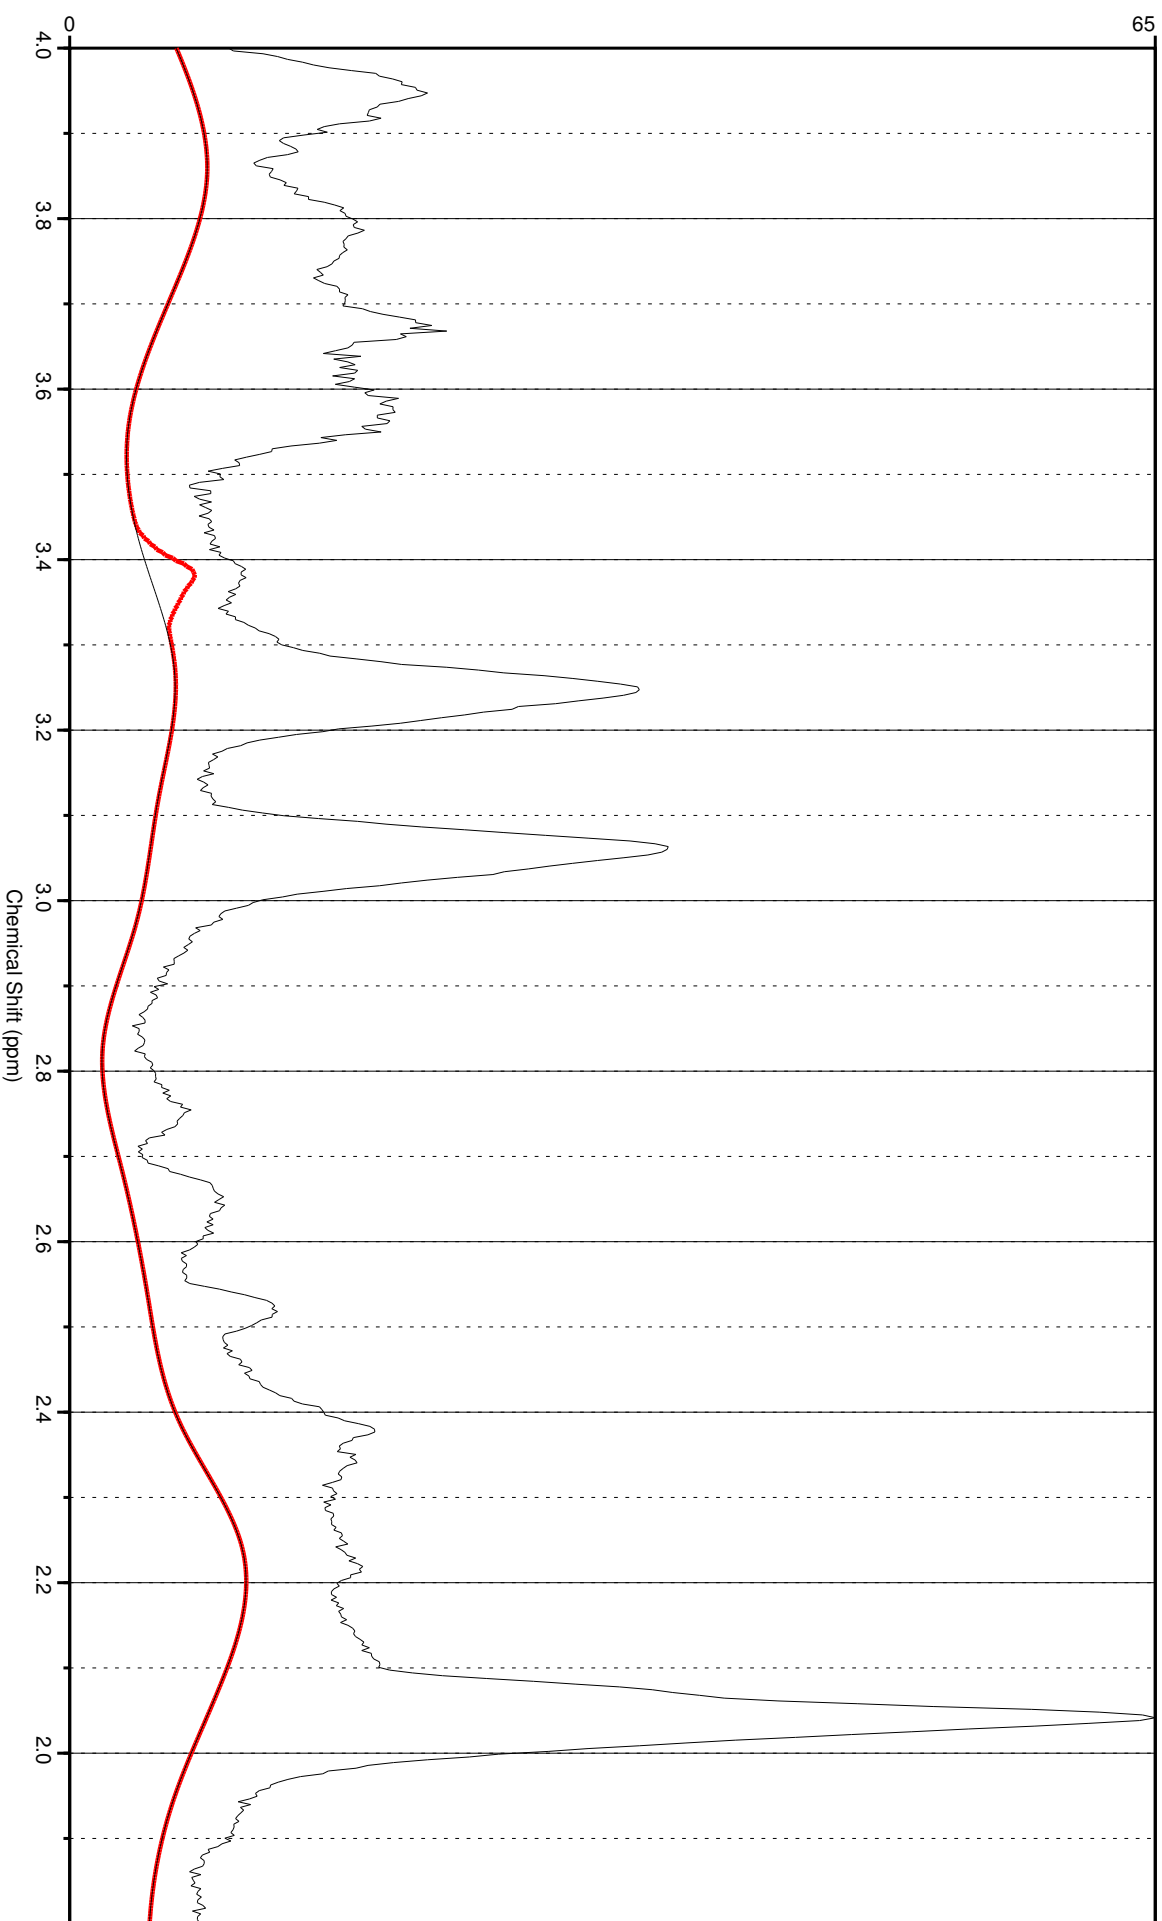



Slice#3 Row#9 Col#9 Iothui\_141107\_c03 (14.11.07-13:14:35-STD-1.3.12.2.1107.5.2.34.18930) Series/Acq=8/1 (2014.11.07 13:48) csi\_slaser\_cFOCI TR/TE/NS=5300/38/1, 1.099E+00mL (F 048Y, 89kg) Jaap Jansen SWOL (Scannexus) \_c\_32

MM20 Conc. = 1.01E-02

Data of: Section of Biomedical NMR, Eindhoven University of Technology

LCModel (Version 6.3-1H) Copyright: S.W. Provencher. Ref.: Magn. Reson. Med. 30:672-679 (1993).

16-November-2017 16:25

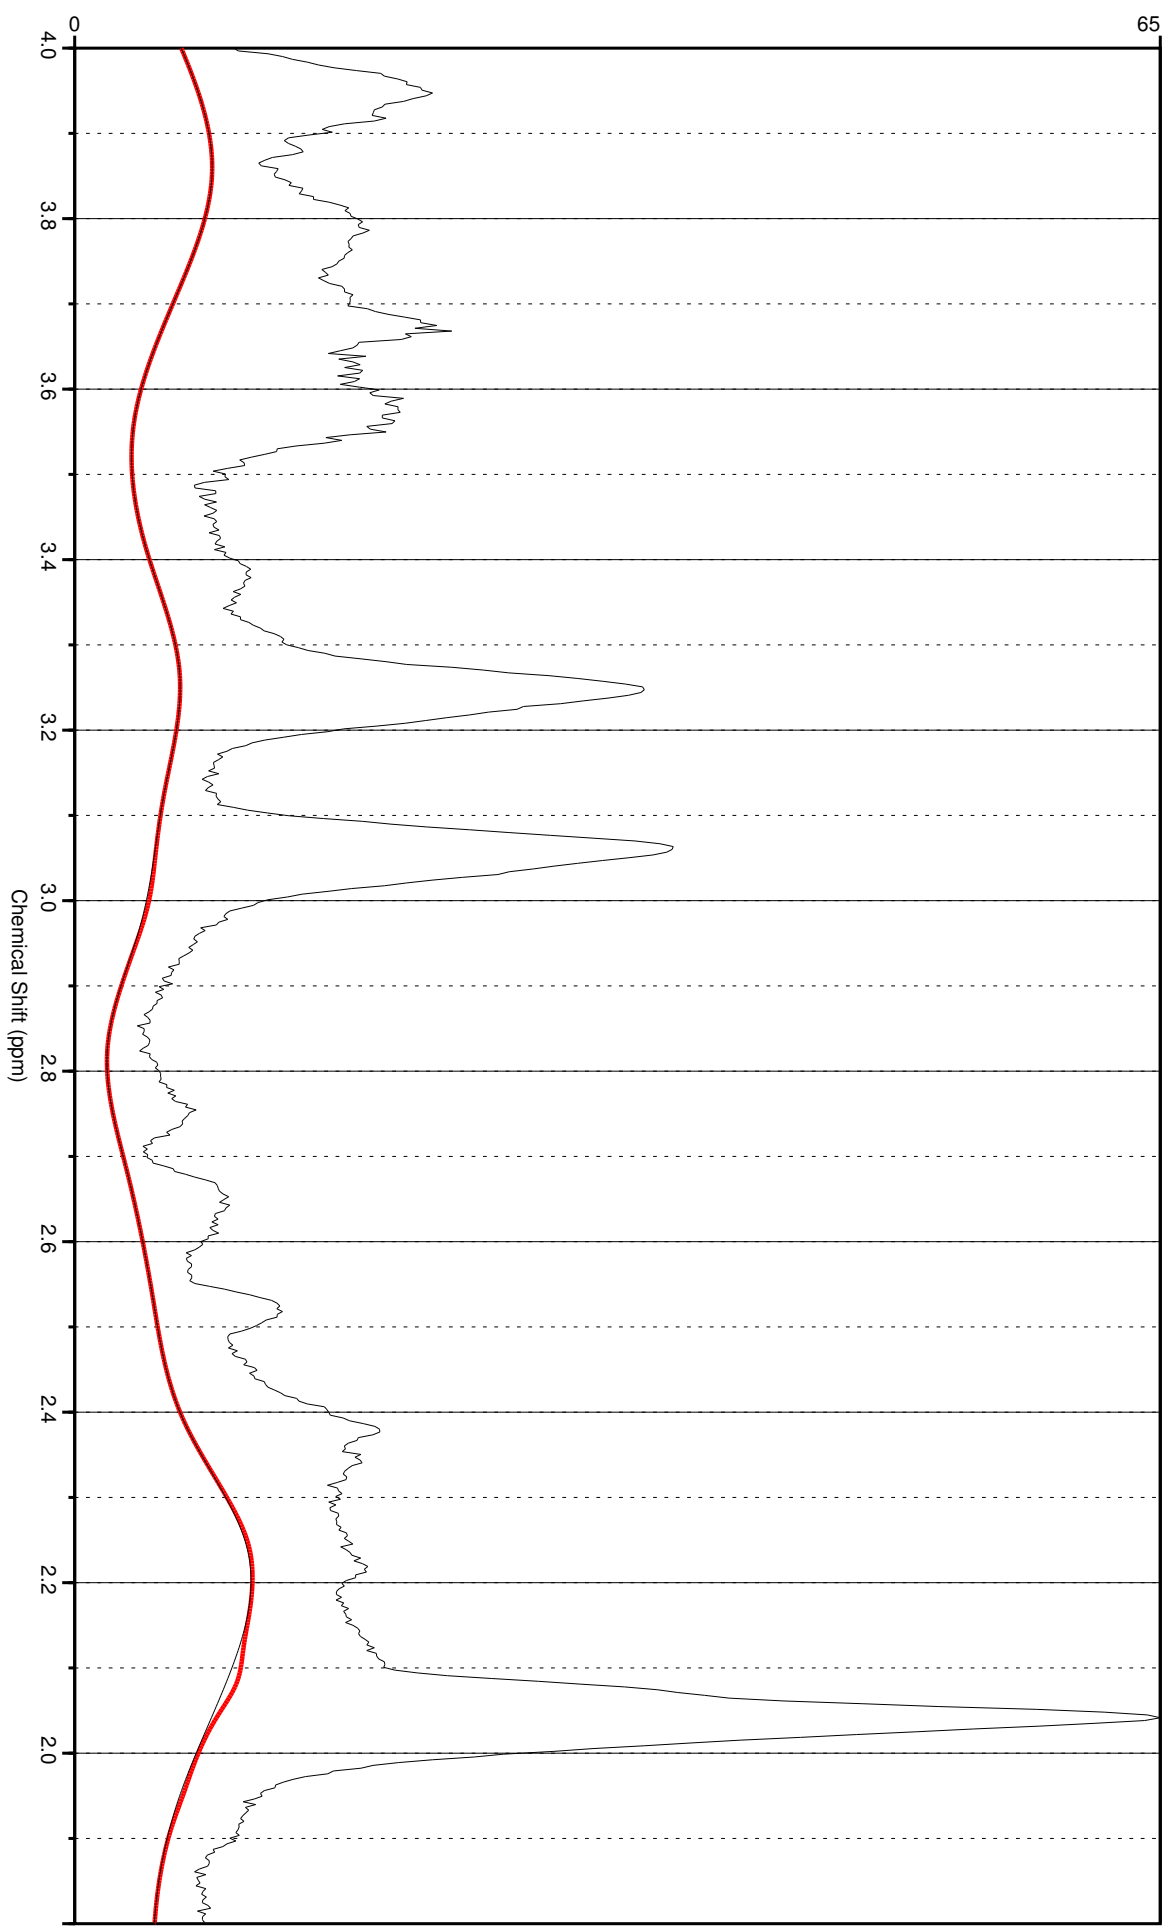

Slice#3 Row#9 Col#9 Iothui\_141107\_c03 (14.11.07-13:14:35-STD-1.3.12.2.1107.5.2.34.18930) Series/Acq=8/1 (2014.11.07 13:48) csi\_slaser\_cFOCI TR/TE/NS=5300/38/1, 1.099E+00mL (F 048Y, 89kg) Jaap Jansen SWOL (Scannexus) \_c\_32

-CrCH2 Conc. = 6.29E-02

Data of: Section of Biomedical NMR, Eindhoven University of Technology

LCModel (Version 6.3-1H) Copyright: S.W. Provencher. Ref.: Magn. Reson. Med. 30:672-679 (1993).

16-November-2017 16:25

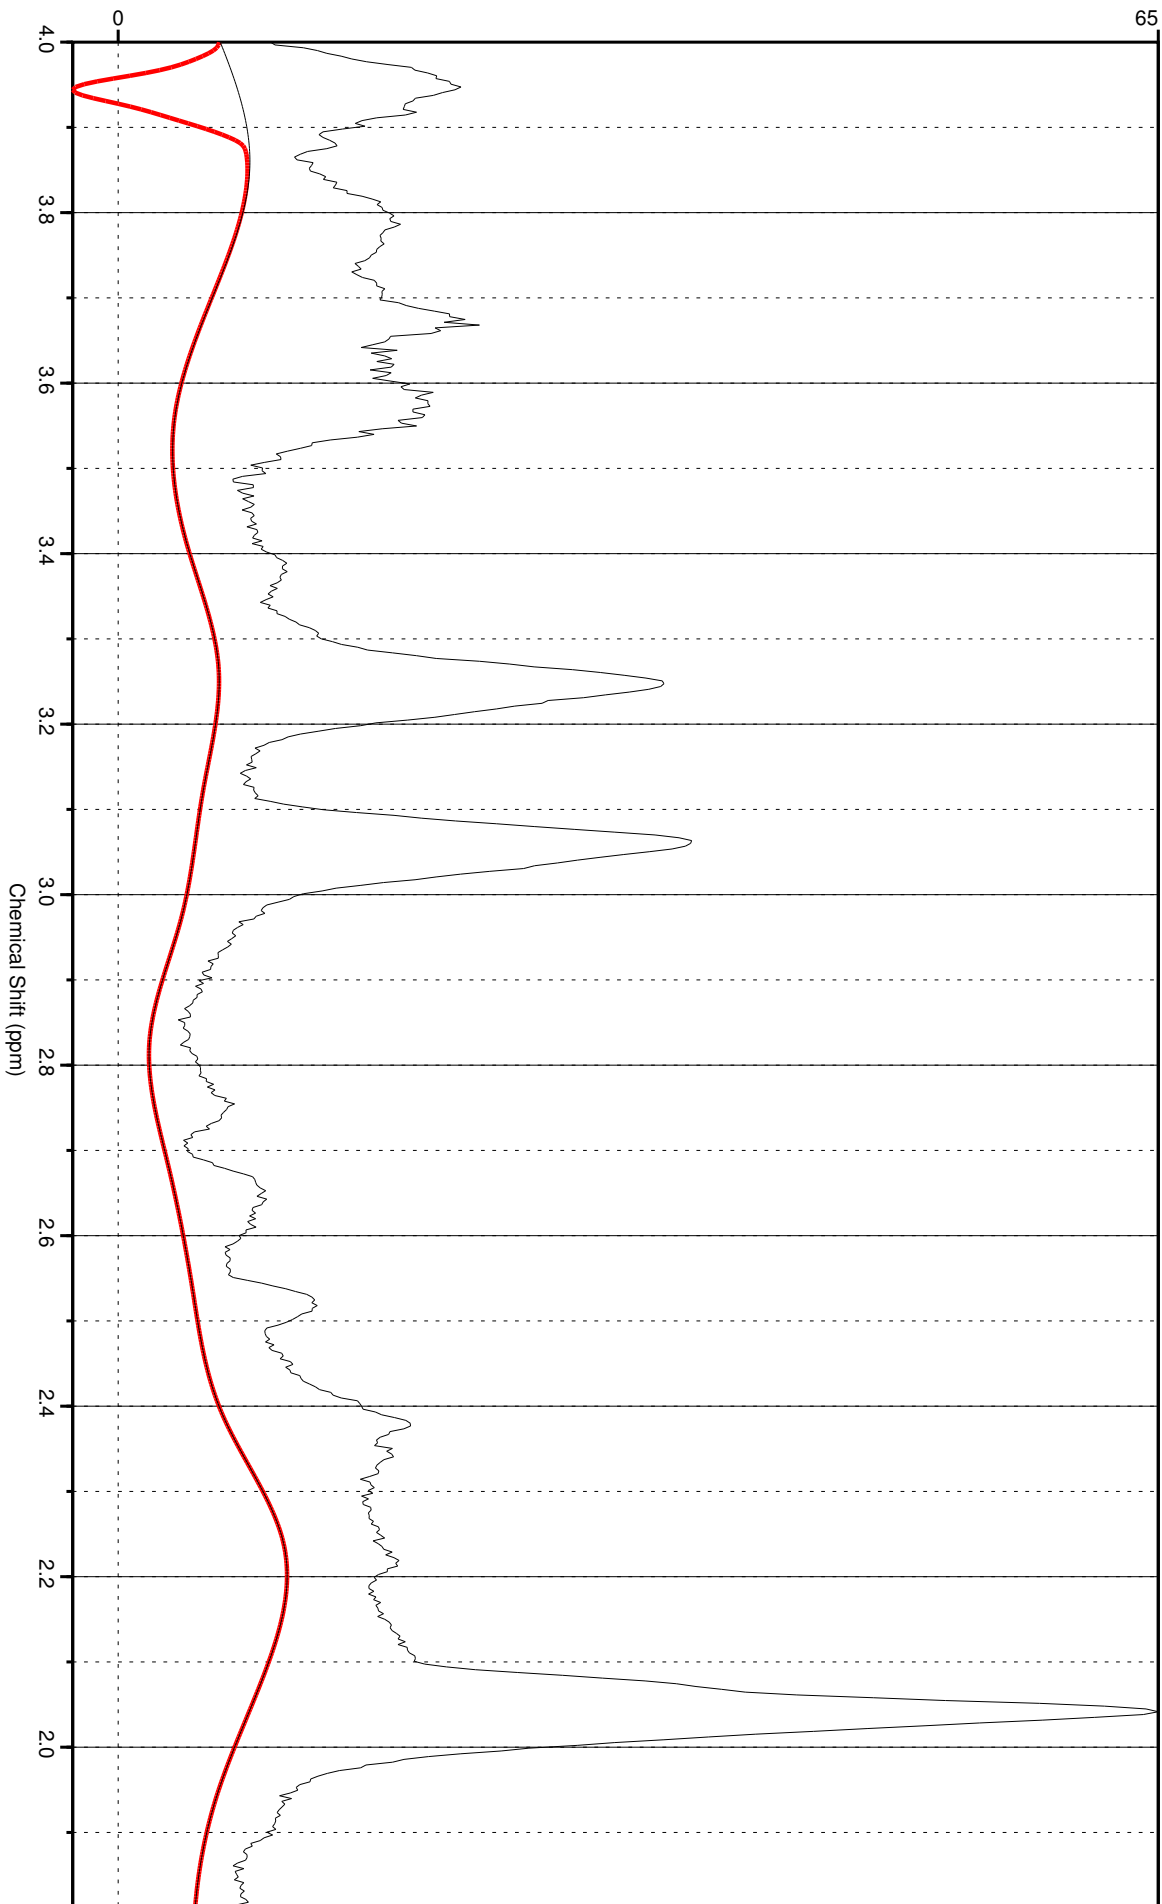

Supplement: mmc1.pdf [file mmc1.pdf]
